1 ***In vivo* fluorescence lifetime imaging captures metabolic changes in macrophages during wound**  
2 **responses in zebrafish**

3  
4 Veronika Miskolci<sup>1</sup>, Kelsey E Tweed<sup>2,6</sup>, Michael R Lasarev<sup>3</sup>, Emily C Britt<sup>2,4</sup>, Courtney E McDougal<sup>1</sup>,  
5 Alex J Walsh<sup>2,5</sup>, Jing Fan<sup>2,4</sup>, John-Demian Sauer<sup>1</sup>, Melissa C Skala<sup>2,6\*</sup> and Anna Huttenlocher<sup>1,7\*</sup>

6  
7 <sup>1</sup>Department of Medical Microbiology and Immunology, University of Wisconsin-Madison, Madison,  
8 WI, USA

9 <sup>2</sup>Morgridge Institute for Research, Madison, WI, USA

10 <sup>3</sup>Department of Biostatistics & Medical Informatics, University of Wisconsin-Madison, Madison, WI,  
11 USA

12 <sup>4</sup>Department of Nutritional Sciences, University of Wisconsin-Madison, Madison, WI, USA

13 <sup>5</sup>Current affiliation: Department of Biomedical Engineering, Texas A&M University, College Station,  
14 TX, USA

15 <sup>6</sup>Department of Biomedical Engineering, University of Wisconsin-Madison, Madison, WI, USA

16 <sup>7</sup>Department of Pediatrics, University of Wisconsin-Madison, Madison, WI, USA

17

18 \*Co-corresponding Authors:

19 Melissa Skala | [mcskala@wisc.edu](mailto:mcskala@wisc.edu)

20 Anna Huttenlocher | [huttenlocher@wisc.edu](mailto:huttenlocher@wisc.edu) (primary contact)

21

22

23

24

25

26

27

28

29

30

31

32

33

34

35

36

37

38

39 **Abstract**

40 The effector functions of macrophages across the spectrum of activation states *in vitro* are linked to  
41 profound metabolic rewiring. However, the metabolism of macrophages remains poorly characterized *in*  
42 *vivo*. To assess changes in the intracellular metabolism of macrophages in their native inflammatory  
43 microenvironment, we employed two-photon fluorescence lifetime imaging microscopy (FLIM) of  
44 metabolic coenzymes NAD(P)H and FAD. We found that pro-inflammatory activation of macrophages *in*  
45 *vivo* was associated with a decrease in the optical redox ratio [NAD(P)H/(NAD(P)H+FAD)] relative to a  
46 pro-resolving population during both infected and sterile inflammation. FLIM also resolved temporal  
47 changes in the optical redox ratio and lifetime variables of NAD(P)H in macrophages over the course of  
48 sterile inflammation. Collectively, we show that non-invasive and label-free imaging of autofluorescent  
49 metabolic coenzymes is sensitive to dynamic changes in macrophage activation in interstitial tissues. This  
50 imaging-based approach has broad applications in immunometabolism by probing in real time the  
51 temporal and spatial metabolic regulation of immune cell function in a live organism.

52

53 **Significance**

54 Metabolic regulation of macrophage effector functions has recently emerged as a key concept in immune  
55 cell biology. Studies rely on *in vitro* and *ex vivo* approaches to study macrophage metabolism, however  
56 the high plasticity of these cells suggest that removal from their native microenvironment may induce  
57 changes in their intracellular metabolism. Here, we show that fluorescence lifetime imaging microscopy  
58 of metabolic coenzymes captures dynamic changes in the metabolic activity of macrophages while  
59 maintaining them in their endogenous microenvironment. This approach also resolves variations on a  
60 single-cell level, in contrast to bulk measurements provided by traditional biochemical assays, making it a  
61 potentially valuable tool in the field of immunometabolism.

62

63

64

65

66

67

68

69

70

71

72

## 73 **Introduction**

74 Macrophages are innate immune cells from myeloid origin, distributed throughout most tissues of the  
75 body, and play key functions both in health and disease (1, 2). The heterogeneity and diversity in  
76 macrophage phenotypes and functions are well documented (3-5). Macrophages are commonly described  
77 in the literature as classically (M1) or alternatively (M2) activated, where M1 macrophages are associated  
78 with pro-killing functions such as eliminating pathogens and tumor cells, while M2 cells promote  
79 processes associated with wound healing and tumor progression. The simplistic nature of the M1/M2  
80 classification, especially in context of *in vivo* biology, is controversial (6, 7), however it provides a  
81 framework amid the complexity of macrophage biology and remains widely used. Studies on macrophage  
82 activation recognized early on that M1 and M2 activation correlated with differential processing of some  
83 metabolites, most notably arginine (8). However, the importance of metabolic regulation of macrophage  
84 function was not fully appreciated until more recently, when it was recognized that some metabolic  
85 pathways are profoundly altered in classically activated macrophages (9, 10). This led to the emergence  
86 of metabolic reprogramming as a key hallmark of immune cell activation, that stresses that the metabolic  
87 state is not an outcome but a determinant of immune cell activation and function (11, 12). This is apparent  
88 from multiple metabolites functioning as signaling molecules outside of their traditional roles as  
89 intermediates in metabolic pathways (13). Evidence indicates that classically activated macrophages are  
90 glycolytic, while oxidative phosphorylation is the main fuel source during alternative activation (13, 14).  
91 Most studies in immunometabolism rely on using singular stimuli to activate macrophages, such as LPS  
92 or interleukin (IL)-4/IL-13, however macrophages face a complex mixture of stimuli within native tissues  
93 (15). This is further confounded by their plasticity, whereby macrophages readily adapt their responses to  
94 a changing microenvironment (16). This suggests that macrophage metabolism is best studied within the  
95 native microenvironment, however there are limited tools available to address this gap in understanding  
96 macrophage metabolism.

97 Nicotinamide adenine dinucleotide (NADH/NAD<sup>+</sup>) and flavin adenine dinucleotide (FADH<sub>2</sub>/FAD) are  
98 endogenous metabolic coenzymes, and serve as electron carriers in numerous metabolic pathways  
99 including glycolysis, the Krebs cycle, electron transport chain and oxidative phosphorylation (17, 18).  
100 These coenzymes are autofluorescent when reduced and oxidized, respectively, and allow for  
101 fluorescence lifetime imaging microscopy (FLIM) to quantify intracellular metabolism using intensity  
102 and lifetime measurements (17, 18). NADH and NADPH have overlapping spectral properties, and for  
103 accuracy NAD(P)H is used to reflect their combined signals (19). Fluorescence intensity can be used to  
104 determine the optical redox ratio that provides an assessment of the redox state of the cell (20). Multiple  
105 definitions of the optical redox ratio exist, but here we use NAD(P)H/(NAD(P)H+FAD), since an  
106 increase in the optical redox ratio intuitively corresponds with an increase in glycolysis, and it normalizes

107 the values to be between 0 and 1 (21). Fluorescence lifetime measures the time a molecule spends in the  
108 excited state before decaying back to the ground state. Fluorescence lifetimes of NAD(P)H and FAD  
109 correlate with their enzyme-binding activities (17, 18), thereby reflecting changes in their cellular  
110 microenvironment. NADH and FAD exists in two forms, quenched and unquenched, resulting in short  
111 and long lifetimes. NAD(P)H has a short lifetime in the free state and a long lifetime in the protein-bound  
112 state (22). This is the converse for FAD, where FAD has a short lifetime in the bound state and a long  
113 lifetime in the free state. FLIM quantifies each of these lifetime components and the mean lifetime,  
114 defined by the weighted average of the short and long lifetimes. Fluorescence lifetime has several  
115 advantages over intensity measurements (23, 24). FLIM can provide additional biological information by  
116 distinguishing the protein-bound and free states, while NAD(P)H intensity is similar in both states. In  
117 addition, unlike intensity measurements, lifetime is independent of the cellular concentrations of the  
118 coenzymes. Nevertheless, intensity and lifetime in complement can quantify changes in cellular  
119 metabolism and have been used in a variety of applications (18). Importantly, FLIM is a label-free and  
120 non-invasive approach to detect metabolic changes *in situ* and can also resolve heterogeneity within a cell  
121 population based on the single cell-based imaging (25, 26).

122 Here, we explored whether we could use fluorescence lifetime imaging of NAD(P)H and FAD to assess  
123 changes in the metabolic activity of macrophages in a live animal, using larval zebrafish as our *in vivo*  
124 model. Zebrafish is well-suited to these studies given its high similarity to the human immune system (27)  
125 and genome (28), furthermore, the tail fin wounding is an established model of inflammation (29). Given  
126 the optical transparency at larval stage (29), this model is readily combined with fluorescence lifetime  
127 imaging to investigate the metabolic changes in macrophages over the course of an inflammatory  
128 response.

129

## 130 **Results**

131 ***In vitro* validation of FLIM detects changes consistent with known metabolic profile.** Our group and  
132 others have demonstrated that fluorescence lifetime measurements recapitulates the known metabolic  
133 profiles associated with *in vitro* macrophage activation in response to traditional stimuli such LPS/IFN- $\gamma$   
134 and IL-4/IL-13 (30-32). To further validate FLIM for detecting metabolic changes in a whole organism,  
135 first we tested whether we could recapitulate previously reported findings on macrophage activation *in*  
136 *vitro* in response to an intracellular pathogen. Gillmaier *et al* used  $^{13}\text{C}$ -isotopologue profiling to trace  
137 carbon metabolism during infection of primary mouse macrophages with the intracellular pathogen,  
138 *Listeria monocytogenes* (*Lm*), and found that infection is associated with increased glycolytic activity in  
139 the host cells (33). In a similar fashion, we infected mouse bone marrow derived macrophages (BMDM)  
140 with *L. monocytogenes* and performed fluorescence lifetime imaging of NAD(P)H and FAD on live cells

141 at 5-6 hours post infection (hpi). Intracellular growth of *L. monocytogenes* peaks by 5 hpi and remains at a  
142 plateau, and by 8 hpi a fraction of macrophages undergo cell death (34). Intracellular infection was  
143 monitored by mCherry labeling of *L. monocytogenes*. The optical redox ratio is a measure of the  
144 oxidation-reduction state of the cells, and increased glycolytic rate generates NADH leading to an  
145 increase in NADH levels, thereby an increase in the redox ratio [as defined here  $\text{NAD(P)H}/(\text{NAD(P)H} +$   
146  $\text{FAD})$ ] (17, 18). As expected, we detected a slight but significant increase in the optical redox ratio of  
147 infected macrophages compared to uninfected control (Figure 1A, B; the mCherry signal was used to  
148 subtract the bacterial metabolic data (see figure legend and methods) to exclude from macrophage  
149 metabolism). This change in the optical redox ratio is consistent with an increase in glycolytic activity of  
150 the infected host cells measured by  $^{13}\text{C}$ -isotopologue profiling. *L. monocytogenes* infection of  
151 macrophages resulted in the increase of the mean lifetime ( $\tau_m$ ) of NAD(P)H, but not FAD (Figure 1C, D).  
152 We also observed alterations in the individual lifetime components that were associated mostly with  
153 NAD(P)H (Figure S1A-F).

154

155 ***In vivo* validation of FLIM with metabolic inhibitor treatment produces predicted changes in the**  
156 **optical redox ratio.** To further validate *in vivo* detection of metabolic changes in macrophages, next we  
157 carried out metabolic inhibitor treatment in our *in vivo* system to monitor for predicted changes in the  
158 optical redox ratio of macrophages responding to a tail wound in larval zebrafish. To be able to segment  
159 autofluorescence signal associated with macrophages from the whole tissue, we used a transgenic reporter  
160 line where macrophages are identified by fluorescent protein expression. We have empirically tested the  
161 compatibility of several fluorescent proteins with the spectral properties of NAD(P)H and FAD (data not  
162 shown). We found that GFP is suitable to image in conjunction with NAD(P)H, but it excludes the  
163 acquisition of FAD as they have overlapping spectra. However, we found mCherry to be compatible for  
164 imaging with NAD(P)H and FAD. We also optimized imaging on live larvae. Serial acquisition of  
165 NAD(P)H and FAD was not suitable for imaging motile cells, such as macrophages, in live larvae (35).  
166 To accommodate cell movement during image acquisition in live larvae, we employed the wavelength  
167 mixing approach that allows for simultaneous acquisition in three different channels (36). We performed  
168 simple tail fin transection on transgenic larvae (*Tg(mpeg1:mCherry-CAAX)* that labels macrophages with  
169 mCherry), and performed fluorescence lifetime imaging of NAD(P)H and FAD at the wound region  
170 (Figure 2A) at 3-6 hours post tail transection (hptt) in the absence or presence of glycolysis inhibitor 2-  
171 deoxy-d-glucose (2-DG). 2-DG is a glucose analog and acts as a competitive inhibitor of glycolysis at the  
172 step of phosphorylation of glucose by hexokinase (37). As inhibiting glycolysis reduces NADH levels  
173 (17, 18), we expected the optical redox ratio to decrease in macrophages of treated larvae compared to  
174 untreated control. Indeed, the optical redox ratio was significantly lower in macrophages in the 2-DG-

175 treated larvae (Figure 2B, C). This change was driven by a decrease in NAD(P)H intensity in treated  
176 larvae, while FAD intensity remained similar to control levels (data not shown). NAD(P)H  $\tau_m$   
177 significantly decreased in macrophages of treated larvae, while the change for FAD  $\tau_m$  was marginal  
178 (Figure 2D, E). We also observed significant changes in some of the individual lifetime components of  
179 NAD(P)H and FAD (Figure S2A-F). These effects on NAD(P)H and FAD lifetime endpoints were  
180 similar to the effects observed during 2-DG treatment of activated T cells (21). In sum, upon inhibition of  
181 glycolysis with 2-DG in our *in vivo* tail wound model, we observed the expected changes in the optical  
182 redox ratio in macrophages responding to sterile wounds, supporting the utility of this approach to detect  
183 changes in macrophage metabolism in interstitial tissues of live animals.

184

### 185 **Fluorescence lifetime imaging detects metabolic changes in macrophage subsets at infected tail**

186 **wounds.** To begin to address whether fluorescence lifetime imaging could distinguish different  
187 macrophage populations in a whole organism, we decided to use our recently developed zebrafish  
188 infected tail wound model (38). This allows us to induce the recruitment of differentially polarized  
189 macrophages under physiological conditions. The infected tail wound model combines the simple tail fin  
190 transection with *L. monocytogenes* infection, and provokes an extensive and sustained infiltration of  
191 macrophages, that is characterized by a large portion of macrophages expressing high levels of TNF $\alpha$   
192 (38). TNF $\alpha$  is a well-established marker of the M1-like pro-killing phenotype of macrophages across  
193 several species, including zebrafish (3, 39). This inflammatory response is unlike what we observe  
194 following the simple tail fin transection, where most macrophages are TNF $\alpha$ - throughout the course of  
195 the wound response (38). Due to the lack of TNF $\alpha$  expression, the macrophages at the simple tail wound  
196 are presumed to represent differentially polarized macrophages, most likely the M2-like (39).  
197 Based on the recruitment of differentially polarized macrophage populations by these tail wound models,  
198 we hypothesized that we would detect differences in the metabolic activity of macrophages between the  
199 simple and *L. monocytogenes*-infected tail fin wounds. We performed tail fin transection in the absence or  
200 presence of *L. monocytogenes* on double transgenic (*Tg(tnf:GFP) x Tg(mpeg1:mCherry-CAAX)*) larvae,  
201 and performed lifetime imaging of NAD(P)H at the wound region on live larvae at 48 hours post wound  
202 (hpw). In this set of experiments we performed lifetime imaging in conjunction with the TNF $\alpha$  reporter  
203 line (*tnf:GFP*) in order to monitor and group macrophages by TNF $\alpha$  expression during data analysis. The  
204 TNF $\alpha$  reporter line relies on GFP expression to report transcriptional activity of *tnfa* (40), which  
205 precludes acquisition of FAD measurements. As a result, in this experiment we were not able to monitor  
206 changes in the intracellular optical redox ratio. Macrophages at the wound region were identified based on  
207 plasma membrane-localized mCherry expression as above. Since the adaptive immune system has not

208 developed yet at this larval stage, the polarized activation of macrophages in these experiments does not  
209 reflect the involvement of T cells (27). As previously reported (38), the infected tail wound recruited  
210 significantly more macrophages compared to the uninfected control (simple tail wound). While both tail  
211 wounds recruited a macrophage population with mixed levels of TNF $\alpha$  expression, macrophages at the  
212 infected tail wound were significantly more M1-like as most cells had high TNF $\alpha$  expression, while the  
213 majority were TNF $\alpha$ - at the uninfected control (Figure 3A, Figure S3C). We detected a significant  
214 reduction in the mean lifetime of NAD(P)H for TNF $\alpha$ + relative to TNF $\alpha$ - macrophages from either the  
215 uninfected control or *Lm*-infected tail wound (Figure 3B). NAD(P)H  $\tau_m$  was also significantly reduced in  
216 macrophages from *Lm*-infected tail wounds relative to uninfected control when comparing either the  
217 TNF $\alpha$ - or TNF $\alpha$ + groups (Figure 3B). The trends for the differences in the individual lifetime  
218 components of NAD(P)H were similar to that observed for  $\tau_m$  (Figure S3A, B), while we did not detect  
219 any significant changes in the fractional component of free NAD(P)H ( $\alpha_1$ ) in any of the comparisons  
220 (Figure 3C). Next, we repeated the same set of experiments but without the TNF $\alpha$  reporter line, in order  
221 to acquire FAD lifetime measurements and monitor changes in the optical redox ratio. We detected a  
222 significant reduction in the mean lifetime and other individual lifetime components of NAD(P)H in  
223 macrophages at the wound of the *Lm*-infected larvae (Figure 4C, Figure S4B, C), consistent with the  
224 measurements above (Figure 3B, Figure S3A, B); under these conditions, we found that NAD(P)H  $\alpha_1$   
225 significantly increased in macrophages at the *Lm*-infected wound (Figure S4A). The presence of infection  
226 at the tail wound did not induce any significant changes in FAD lifetime endpoints (Figure 4D, Figure  
227 S4D-F). Interestingly, the optical redox ratio was significantly reduced in macrophages in the highly  
228 inflammatory *Lm*-infected wound as compared to the uninfected control wound (Figure 4A, B). This  
229 result was unexpected considering the observed increase of the redox ratio in the context of the *in vitro*  
230 infection of BMDM with *L. monocytogenes* (Figure 1B). We reasoned this result may be influenced by  
231 the presence of an intracellular pathogen in macrophages at the *Lm*-infected tail wound, and not solely  
232 due to a more inflammatory macrophage phenotype. To test this, we proceeded to measure changes in the  
233 cellular metabolism of macrophages in context of a sterile tail wound that induces the recruitment of  
234 TNF $\alpha$ + macrophages.

235

236 **Fluorescence lifetime imaging of NAD(P)H and FAD resolves changes in the metabolic activity of**  
237 **macrophages over the course of a sterile inflammatory response.** To measure metabolic activity of  
238 macrophages during sterile inflammation, we used our recently developed zebrafish thermal injury tail  
239 wound model (38). This injury is produced by briefly burning the tail fin tissue distal to the notochord  
240 using a surgical cautery wire. Similarly to the infected wound, the burn wound also elicits the recruitment



241 of a more M1-like macrophage population compared to the simple transection, where a large percentage  
242 of macrophages are TNF $\alpha$ + (38). Unlike at the infected wound where expression of TNF $\alpha$  persists,  
243 TNF $\alpha$ + macrophages peak at 24 hpw and resolve thereafter, with most macrophages at the wound being  
244 TNF $\alpha$ - by 72 hpw following thermal injury (38). We performed lifetime imaging of NAD(P)H and FAD  
245 at these two time points to compare the metabolic activity of macrophages in response to simple  
246 transection and thermal injury. Since macrophages are mostly TNF $\alpha$ - throughout the course of the wound  
247 response following a simple transection, we speculated that the metabolic activity of macrophages would  
248 be different at 24 hpw, but not at 72 hpw, at the two wounds. We performed tail fin transection or burn  
249 wound distal to the notochord on transgenic (*Tg(mpeg1:mCherry-CAAX)*) larvae, and performed lifetime  
250 imaging at the wound region on live larvae at 24 and 72 hpw (Figure 5A). As expected, we observed  
251 significant differences in the metabolic activity of macrophages between the wounds at 24 hpw, but the  
252 cellular metabolism was similar at 72 hpw. Importantly, at 24 hpw the optical redox ratio was lower in  
253 macrophages at the burn wound relative to macrophages at the simple transection (Figure 5B), similar to  
254 what was observed at the infected wound (Figure 4B). The trends for the differences in the mean lifetime  
255 and individual lifetime components of NAD(P)H and FAD between the burn wound and the simple  
256 transection was also similar to what we observed between the infected wound and the simple transection  
257 (Figure 5C, D, Figure S5A-F). As expected, the optical redox in macrophages was not different between  
258 the simple transection and burn wound at 72 hpw (Figure 5B). Macrophages are mostly TNF $\alpha$ - at both  
259 wounds by 72 hpw (38), suggesting that the macrophage populations present at these wounds have similar  
260 activation states and thereby likely to have similar metabolic activity. The mean lifetime of NAD(P)H was  
261 significantly lower in macrophages at the burn wound relative to the simple transection at 72 hpw, while  
262 it was similar for FAD (Figure 5C, D); most of individual lifetime components of NAD(P)H and FAD  
263 were also similar between the two wounds at 72 hpw (Figure S5A-F). Generally, most of the changes in  
264 lifetime endpoints were associated with NAD(P)H, and they were consistent across the different wound  
265 models (Table 1). Furthermore, we also detected temporal changes in the metabolic activity of  
266 macrophages during the wound responses. The optical redox ratio of macrophages increased over time in  
267 response to the simple transection, as well as to thermal injury (Figure 5B). This would be expected as the  
268 macrophage population at the burn wound becomes more like macrophages at simple transection over  
269 time, based on TNF $\alpha$  expression (38). In line with this, the trends for the changes in the lifetime endpoints  
270 over time were also similar at the two wounds. NAD(P)H  $\tau_m$  increased and FAD  $\tau_m$  decreased over time  
271 at both wounds (Figure 5C, D); the trends for changes in the individual lifetime components of NAD(P)H  
272 and FAD over time were also similar at the two wounds (Figure S5A-F).

273



274 To further substantiate the metabolic changes observed in macrophages at the sterile tail wounds, we  
275 tested whether we could recapitulate our FLIM measurements with a different method. Fluorescence  
276 intensities of NAD(P)H and FAD detected by FLIM is a measure of their relative intracellular abundance.  
277 Similarly, we analyzed the abundance of NADH, NADPH and FAD by targeted metabolomics (41). We  
278 performed tail fin transection or burn wound distal to the notochord on wild-type zebrafish larvae and  
279 collected the tail fin tissue distal to the caudal vein/artery loop (to remain close to the wound  
280 microenvironment) 24 hours following injury for targeted metabolomics (Figure 5E). The technical  
281 limitation here is that we analyzed the abundance of these small metabolites in the whole tail fin tissue,  
282 not macrophages alone, because it is difficult to collect sufficient numbers of macrophages from such a  
283 small region to reach the detection limit of the mass spectrometer. We calculated the relative abundances  
284 of NAD(P)H and FAD in burn wound compared to transection, and found the trends measured by both  
285 FLIM and mass spectrometry are consistent, i.e. the NAD(P)H level are similar in both wound models,  
286 while FAD level is lower in transection (Figure 5F). Additionally, we compared the redox ratio measured  
287 in each wound model by mass spectrometry and FLIM (Figure 5G). The two methods gave similar  
288 results, and both showed the trend that the redox ratio is higher in transection. The differences in redox  
289 ratio values measured by these two methods is likely due to the fact that our metabolomics method  
290 measures the whole tail fin tissue of wound microenvironment, while FLIM measures the wound-  
291 associated macrophages specifically.

292

## 293 **Discussion**

294 Immunometabolism has become a fast-growing and exciting field based on the realization that  
295 metabolism plays a profound regulatory role in immune cell activation (11, 12). New therapies are  
296 focused on metabolic targets in immune cells, such as macrophages, which play a key role in  
297 autoimmunity and the progression of human diseases such as arthritis, atherosclerosis and cancer (12, 42,  
298 43). *In vitro* analyses have formed the foundation of immunometabolism and have provided fundamental  
299 insights into the metabolic regulation of immune cell biology. However *in vitro* studies fail to reflect the  
300 complexities associated with *in vivo* environments, including the input from mixed signals and  
301 interactions with other cells (15). An understanding of *in vivo* behavior has been hampered by the lack of  
302 tools available for the *in vivo* assessment of functional metabolic changes. As a result,  
303 immunometabolism *in vivo* remains poorly characterized. Lifetime imaging of the endogenous  
304 fluorescence of metabolic coenzymes is an attractive approach because it allows for the quantitative  
305 analysis of metabolic changes on a single-cell level, while maintaining cells in their native  
306 microenvironment. Studies on the metabolic profiles of macrophages *in vivo* using FLIM have been  
307 limited, with one study demonstrating that macrophages have distinguishable lifetime signatures from

308 tumor cells at the tumor microenvironment (44). Here, we took advantage of complex *in vivo* wound  
309 models we recently developed that each induce a characteristic macrophage inflammatory response (38).  
310 This is, to our knowledge, is the first study to examine the potential of fluorescence lifetime imaging to  
311 distinguish macrophages with differential activation states within interstitial tissues in live animals.

312  
313 Our findings suggest that macrophage metabolism *in vitro* and *in vivo* may differ. Macrophages infected  
314 by *L. monocytogenes in vitro* exhibited increased optical redox ratio relative to uninfected macrophages  
315 (Figure 1B), however we found that infection of live zebrafish reduced the optical redox ratio in  
316 macrophages (Figure 4B). Surprisingly, we found that pro-inflammatory macrophages even at sterile  
317 inflammatory sites were also associated with reduced optical redox ratios (Figure 5B), suggesting that a  
318 pro-inflammatory macrophage population *in vivo* has more oxidative metabolic state in general. We  
319 characterized macrophage populations in live zebrafish larvae using the TNF $\alpha$  reporter (40), and  
320 categorized cells with high TNF $\alpha$  expression as M1-like. Currently, there are no live reporters to mark the  
321 M2-like macrophage population in larval zebrafish, and the lack of TNF $\alpha$  expression does not confirm  
322 that. Nevertheless, we consider TNF $\alpha$ - and TNF $\alpha$ + macrophages as different populations of cells. In  
323 light of the known *in vitro* metabolic profiles of macrophages, we expected a macrophage population with  
324 large number TNF $\alpha$ + cells to exhibit a more glycolytic state and thereby have higher redox ratio relative  
325 to a mostly TNF $\alpha$ - macrophage population. One caveat of intensity-based measurements is that other  
326 fluorophores, such as elastin and lipofuscin, could contribute to the intensity signals for the redox ratio  
327 and be a source of error (24). The source and role of the observed oxidative metabolism in macrophages  
328 in the context of infection and sterile inflammation *in vivo* require further analysis. Our initial analysis  
329 suggests that mitochondrial reactive oxygen species (mROS) contributes to the observed NAD(P)H and  
330 FAD lifetime profiles during sterile inflammation without affecting the redox state of the cell (data not  
331 shown), and it will be interesting to further explore the role of mROS in macrophage activation and  
332 function *in vivo*.

333  
334 Interestingly, we found that TNF $\alpha$  expression in macrophages at the infected tail wound was associated  
335 with a graded effect on NAD(P)H lifetime endpoints that was on a spectrum (Figure 3B, Figures S3A, B),  
336 where TNF $\alpha$ - macrophages from uninfected wound (control) are on one end of the spectrum, while  
337 TNF $\alpha$ + cells from the infected wound are on the opposite end. As we move on this spectrum, we see a  
338 graded change in the lifetime endpoints in the same direction from one end to the other end, reminiscent  
339 of the concept that macrophage activation *in vivo* occurs on a spectrum as opposed to a more strict M1 or  
340 M2 (3). These results suggest that FLIM is sensitive to variations in macrophage populations across

341 different levels of activation. Furthermore, we found that fluorescence lifetime imaging is also able to  
342 resolve time-related changes in macrophage metabolism. We observed that the redox ratio in  
343 macrophages increased over time, both at the simple tail wound and the burn wound (Figure 5B). The  
344 observation that changes in metabolic activity of macrophages at the burn wound resembles the changes  
345 at the simple tail wound is expected, as the macrophage population at the burn wound becomes similar to  
346 that at the simple wound over time (38). Previously we described that the macrophage population at the  
347 burn wound is mostly TNF $\alpha$ +, however over time the macrophage population becomes mostly TNF $\alpha$ -,  
348 similar to the simple wound, at this switch in activation phenotype coincided with a recovery in wound  
349 healing (38). The observed increase in the optical redox ratio over time is interesting. Macrophages  
350 polarize towards a pro-healing M2-like state during wound healing, based on which we expected  
351 macrophages to have a more oxidative metabolism (11, 14) and thereby display a reduction in the optical  
352 redox ratio. However, it has been demonstrated that M2-like macrophages are more motile compared to  
353 M1-like cells (45) and glycolytic reprogramming has been shown to be important for macrophage  
354 migration (46). These reports suggest that the observed increase in the optical redox ratio, reflecting an  
355 increase in glycolytic activity, may be supporting the more motile nature of pro-healing M2-like cells.

356

357 With the emergence of immunometabolism it is now recognized that metabolic reprogramming underlies  
358 macrophage activation and function. Differential activation of macrophages plays a central role in host  
359 health and disease progression, underscoring the importance of studying macrophage metabolism *in vivo*.  
360 We have shown that fluorescence lifetime imaging of NAD(P)H and FAD is able to resolve metabolic  
361 changes in macrophages with distinct activation states *in situ* in a live organism, suggesting that FLIM  
362 can be a valuable imaging-based tool to study the metabolic regulation of immune cell function *in vivo*.

363

## 364 **Materials and methods**

### 365 **Ethics**

366 Animal care and use was approved by the Institutional Animal Care and Use Committee of University of  
367 Wisconsin and strictly followed guidelines set by the federal Health Research Extension Act and the  
368 Public Health Service Policy on the Humane Care and Use of Laboratory Animal, administered by the  
369 National Institute of Health Office of Laboratory Animal Welfare.

370

### 371 **Zebrafish husbandry**

372 All protocols using zebrafish and mouse in this study have been approved by the University of  
373 Wisconsin-Madison Research Animals Resource Center (protocols M005405-A02/zebrafish,  
374 M005916/mouse). Adult zebrafish were maintained on a 14 h:10 h light/dark schedule. Upon fertilization,

375 embryos were transferred into E3 medium and maintained at 28.5°C. To prevent pigment formation,  
376 larvae were maintained in E3 medium containing 0.2 mM *N*-Phenylthiourea (PTU) (Sigma-Aldrich, St.  
377 Louis, MO) starting at 1 dpf. Adult wild-type AB strain zebrafish and transgenic zebrafish lines including  
378 *Tg(tnf:GFP)*(40) and *Tg(mpeg1:Cherry-CAAX)*(47) were utilized in this study.

379

### 380 **Bacterial culture and preparation**

381 Unlabeled or mCherry-expressing *Listeria monocytogenes* strain 10403 was used in this study. *L.*  
382 *monocytogenes* were grown in brain–heart-infusion (BHI) medium (Becton, Dickinson and Company,  
383 Sparks, MD). A streak plate from frozen stock was prepared and grown overnight at 37°C; the plate was  
384 stored at 4°C. The day before infection, a fresh colony was picked from the streak plate and grown  
385 statically in 1 mL BHI overnight at 30°C to reach stationary phase and to flagellate bacteria. The next day  
386 bacteria were prepared to infect either primary macrophages or zebrafish larvae. To prepare for infection  
387 of primary cells, the 1 mL suspension was diluted with 1 mL sterile PBS, OD was determined to calculate  
388 the number of bacteria to infect cells at multiplicity of infection (MOI) of 2 (1 cell: 2 bacteria) (OD 1= 7.5  
389 x 10<sup>8</sup> bacteria). To prepare for zebrafish tail wound infection, bacteria were sub-cultured for ~1.5-2.5 h in  
390 fresh BHI (1:4 culture:BHI; 5 mL total) to achieve growth to mid-logarithmic phase (OD600 ≈ 0.6-0.8).  
391 From this sub-cultured bacterial suspension, 1 mL aliquot was collected, spun down at high speed for 30  
392 seconds at room temperature, washed three times in sterile PBS and resuspended in 100 µL of sterile  
393 PBS. Unlabeled mCherry-labeled bacteria

394

### 395 ***L. monocytogenes* infection of mouse bone marrow derived macrophages (BMDM)**

396 Six- to 8-week-old C57BL/6 female mice were obtained from NCI/Charles River NCI facility and bone  
397 marrow-derived macrophages were made as previously described (48). Briefly, macrophages were  
398 cultured from bone marrow in the presence of M-CSF derived from transfected 3T3 cell supernatant for 6  
399 days, with an additional supplement of M-CSF medium 3 days postharvest. Cells were frozen down for  
400 storage. The day before infection, frozen cells were thawed and plated in 35 mm glass bottom dishes  
401 (MatTek, Ashland, MA) at 1.6 x 10<sup>6</sup> in 2.4 mL BMDM medium (RPMI containing 10% fetal bovine  
402 serum, 10% CSF, 1% sodium pyruvate, 1% glutamate and 0.1% β-mercaptoethanol) and allowed to  
403 recover overnight at 37°C, 5% CO<sub>2</sub>. The following day 1.6 mL BMDM medium with or without *L.*  
404 *monocytogenes* at MOI 2 was added to cells and incubated at 37°C and 5% CO<sub>2</sub>. After 30 minutes, cells  
405 were rinsed once with BMDM medium and replaced with 2.4 mL medium containing 0.25 mg/mL  
406 gentamicin (Lonza, Walkersville, MD). Cells were maintained at 37°C and 5% CO<sub>2</sub> and imaged live by  
407 FLIM at 5-6 hours post infection.

408

409 **Zebrafish tail wounding**

410 Simple tail fin transection, infected tail fin transection and thermal injury of the tail fin were performed on  
411 3 days post fertilization (dpf) larvae as described previously (38). In preparation for wounding, larvae  
412 were anesthetized in E3 medium containing 0.16 mg/mL Tricaine (ethyl 3-aminobenzoate; Sigma-  
413 Aldrich). Simple tail transection of the caudal fin was performed using surgical blade (Feather, no. 10) at  
414 the boundary of and without injuring the notochord; following transection, larvae were rinsed with E3  
415 medium to wash away Tricaine, placed in fresh milk-coated dishes with fresh E3 medium, and maintained  
416 at 28.5°C until live imaging. For infected tail transection, larvae were placed in 5 mL E3 medium  
417 containing Tricaine in 60-mm milk-treated dish; 100  $\mu$ L unlabeled bacterial suspension in PBS, or 100  $\mu$ L  
418 PBS for control uninfected wounding, was added to the E3 medium and swirled gently to achieve even  
419 distribution of bacteria; tail fin transection of larvae in control or infected E3 medium was performed as  
420 described above; larvae were immediately transferred to a horizontal orbital shaker and shaken for 30 min  
421 at 70-80 rpm; control and infected larvae were then rinsed five times with 5 mL E3 medium without  
422 Tricaine to wash away bacteria and maintained at 28.5°C until live imaging; larvae were not treated with  
423 antibiotics at any point during the experiment. To perform thermal injury, fine tip (type E) of a line-  
424 powered thermal cautery instrument (Stoelting, Wood Dale, IL) was placed into the E3 medium, held to  
425 the posterior tip of the caudal fin, and turned on for 1-2 s until tail fin tissue curled up without injuring the  
426 notochord; following injury, larvae were rinsed with E3 medium to wash away Tricaine, placed in fresh  
427 milk-coated dishes with fresh E3 medium, and maintained at 28.5°C until live imaging.

428

429 **Inhibition of glycolysis in wounded zebrafish**

430 2-deoxy-d-glucose (2-DG; Sigma-Aldrich, St. Louis, MO) treatment of wounded zebrafish larvae (simple  
431 tail transection) was empirically optimized by testing different doses and length of pretreatment. 2-DG is  
432 a weak, but fast acting inhibitor. Inhibitor was freshly prepared for each experiment, dissolved at 100 mM  
433 in E3 medium. Treatment was performed by bathing larvae in E3 medium containing 5 mM 2-DG for 1  
434 hour before imaging. Larvae were kept in the presence of the inhibitor during imaging.

435

436 **Embedding zebrafish larvae for live imaging**

437 Larvae were embedded in 1 mL 1% low gelling agarose prepared in E3 medium in Ibidi  $\mu$ -Slide 2-Well  
438 Glass Bottom Chamber (Ibidi, Fitchburg, WI) and topped off with 1 mL E3 medium. Agarose and top-off  
439 solution were supplemented with 0.16 mg/mL Tricaine to keep larvae anesthetized during imaging. In 2-  
440 DG experiments, agarose and top-off solution were supplement with 5 mM 2-DG to maintain larvae in  
441 the inhibitor.

442

### 443 **Fluorescence Lifetime Imaging of NAD(P)H and FAD**

444 All samples were imaged using a 2-photon fluorescence microscope (Ultima, Bruker) coupled to an  
445 inverted microscope body (TiE, Nikon), adapted for fluorescence lifetime acquisition with time correlated  
446 single photon counting electronics (SPC-150, Becker & Hickl, Berlin, Germany). A 40X (NA=1.15)  
447 water immersion objective was used. An Insight DS+ (Spectra Physics) femtosecond source with dual  
448 emission provided light at 750 nm (average power: 1.4 mW) for NAD(P)H excitation and 1040 nm  
449 (average power: 2.1 mW) for mCherry excitation. FAD excitation at 895 nm was achieved through  
450 wavelength mixing. Wavelength mixing was achieved by spatially and temporally overlapping two  
451 synchronized pulse trains at 750 nm and 1040 nm (36). Bandpass filters were used to isolate light, with  
452 466/40 nm used for NAD(P)H and 540/24 nm for FAD, and 650/45 for mCherry which were then  
453 detected by GaAsP photomultiplier tubes (H7422, Hamamatsu). Fluorescence lifetime decays of  
454 NAD(P)H, FAD, and mCherry were acquired simultaneously with 256 time bins across 256x256 pixel  
455 images within Prairie View (Bruker Fluorescence Microscopy) with a pixel dwell time of 4.6  $\mu$ s and an  
456 integration time of 60 seconds at an optical zoom of 2.00. No change in the photon count rate was  
457 observed, ensuring that photobleaching did not occur. The second harmonic generation obtained from  
458 urea crystals excited at 890 nm was used as the instrument response function and the full width at half  
459 maximum was measured to be 260 ps. BMDM were imaged live in MatTek dishes while maintained at  
460 37°C and 5% CO<sub>2</sub> using a stage top incubator system (Tokai Hit, Bala Cynwyd, PA). Zebrafish larvae  
461 were imaged live at room temperature.

462

### 463 **Fluorescence Lifetime Data Analysis**

464 Fluorescence lifetime components were computed in SPCImage v7.4 (Becker and Hickl). For each image,  
465 a threshold was selected to exclude background. The fluorescence lifetime components were then  
466 computed for each pixel by deconvolving the measured instrument response function and fitting the  
467 resulting exponential decay to a two-component model,  $I(t) = \alpha_1 e^{-t/\tau_1} + \alpha_2 e^{-t/\tau_2} + C$ , where  $I(t)$  is the  
468 fluorescence intensity at time  $t$  after the laser excitation pulse,  $\alpha_1$  and  $\alpha_2$  are the fractional contributions of  
469 the short and long lifetime components, respectively (i.e.,  $\alpha_1 + \alpha_2 = 1$ ),  $\tau_1$  and  $\tau_2$  are the fluorescence  
470 lifetimes of the short and long lifetime components, respectively, and  $C$  accounts for background light. A  
471 two-component decay was used to represent the lifetimes of the free and bound configurations of  
472 NAD(P)H and FAD (22, 49). Images were analyzed at the single cell level. For the *in vitro* macrophages,  
473 cell cytoplasm masks were obtained using a custom CellProfiler pipeline (v.3.1.8) (50). Briefly, the user  
474 manually outlined the nucleus of the cells and those masks were then propagated outwards to find cell  
475 areas. Cytoplasm masks were then determined by subtracting the nucleus masks from the total cell area  
476 masks. Bacteria masks were created in Fiji (51) by thresholding the mCherry intensity images into



477 bacteria and background. The resulting bacteria masks were then subtracted from the corresponding field  
478 of view's masks to exclude bacterial metabolic data. The diffuse cytoplasmic fluorescence in the mCherry  
479 images is likely due to FAD autofluorescence (44). Images of the optical redox ratio (intensity of  
480 NAD(P)H divided by the sum of the intensity of NAD(P)H and the intensity of FAD) and the mean  
481 fluorescence lifetime ( $\tau_m = \alpha_1\tau_1 + \alpha_2\tau_2$ , where  $\tau_1$  is the short lifetime for free NAD(P)H and bound FAD,  
482  $\tau_2$  is the long lifetime of bound NAD(P)H and free FAD, and  $\alpha_1$  and  $\alpha_2$  represent relative contributions  
483 from free and protein-bound NAD(P)H respectively, and the converse for FAD  $\alpha_1$  and  $\alpha_2$ ) of NAD(P)H  
484 and FAD were calculated and autofluorescence imaging endpoints were averaged for all pixels within a  
485 cell cytoplasm using RStudio v. 1.2.1335 (52). For the *in vivo* macrophages, a custom CellProfiler  
486 pipeline segmented the macrophage cell area. Briefly, the pipeline rescaled the mCherry intensity images  
487 to be between 0 and 1 by dividing by the brightest pixel value in the image. Background was excluded by  
488 manually setting a threshold (0.15). Cells were identified using CellProfiler's default object identification.  
489 Then, each cell was manually checked and edited as necessary to exclude background fluorescence and to  
490 include all pixels of each macrophage. Images of the optical redox ratio (intensity of NAD(P)H divided  
491 by the sum of the intensity of NAD(P)H and the intensity of FAD) and the mean fluorescence lifetime ( $\tau_m$   
492  $= \alpha_1\tau_1 + \alpha_2\tau_2$ ; defined above) of NAD(P)H and FAD were calculated and autofluorescence imaging  
493 endpoints were averaged for all pixels within a cell using MATLAB v.9.7.01296695 (R2019b;  
494 Mathworks, Natick, MA).

495

## 496 **Metabolomics**

497 To analyze intracellular metabolites, metabolites were extracted with cold liquid chromatography–mass  
498 spectrometry (LC–MS) grade 80/20 methanol/H<sub>2</sub>O (v/v). Samples were dried under nitrogen flow and  
499 subsequently dissolved in LC–MS grade water for LC–MS analysis methods. Protein pellets were  
500 removed by centrifugation. Samples were analyzed using a Thermo Q-Exactive mass spectrometer  
501 coupled to a Vanquish Horizon Ultra-High Performance Liquid Chromatograph (UHPLC). Metabolites  
502 were separated on a C18 (details below) at a 0.2 ml per min flow rate and 30 °C column temperature.  
503 Data was collected on full scan mode at a resolution of 70 K. Samples were loaded in water and separated  
504 on a 2.1 × 100 mm, 1.7 μM Acquity UPLC BEH C18 Column (Waters) with a gradient of solvent A (97/3  
505 H<sub>2</sub>O/methanol, 10 mM TBA, 9 mM acetate, pH 8.2) and solvent B (100% methanol). The gradient was: 0  
506 min, 5% B; 2.5 min, 5% B; 17 min, 95% B; 21 min, 95% B; 21.5 min, 5% B. Data were collected on a  
507 full scan negative mode. The identification of metabolites reported was based on exact m/z and retention  
508 times, which were determined with chemical standards. Data were analyzed with Maven. Relative  
509 metabolite levels were normalized to protein content.

510



511 **Statistical analyses**

512 Biological repeats are defined as separate clutches of embryos collected on separate days. Statistical  
513 analyses were performed using R v.3.6.2 ([www.R-project.org](http://www.R-project.org))(53). General linear models were fit to data,  
514 where every data point represented a macrophage. Models included *day* (biological repeat) as a blocking  
515 factor. An interaction was included in all models where more than one experimental factor was present  
516 (for example, time and treatment), to determine whether effects associated with experimental factors  
517 modified one another. All models utilized cluster-robust standard errors to account for multiple  
518 macrophages being measured within the same larvae. Log transformation was applied to certain lifetime  
519 endpoints prior to analysis to improve scaling and symmetry, and lessen the influence of outliers. No  
520 adjustment for multiplicity was done. Statistical significance was set to 0.05. All data were graphed using  
521 Prism (GraphPad Software, Inc., San Diego, CA). Each data point in the graphical display represent a  
522 macrophage and the data for each condition is presented as a composite dotplot and boxplot; each  
523 biological repeat is displayed by a different color in the dotplot; boxplots show median (central line), first  
524 and third quartiles (lower and upper lines), and the Tukey method was employed to create the whiskers  
525 (the farthest data points that are no further than 1.5 times the interquartile range); data points beyond  
526 whiskers (refer to dotplot) are considered outliers. Graphical information involving zebrafish experiments  
527 is accompanied by statistical conclusions (below graphs) that account for the cluster-correlated structure  
528 of data as described above.

529

530 **Data and code availability**

531 Data generated and analyzed, including codes and algorithms related to the analysis of data in the current  
532 study are available from the corresponding authors upon request.

533

534 **Acknowledgements**

535 We would like to thank members of the Huttenlocher and Skala laboratories, notably Jayne M Squirrel,  
536 Elizabeth Berge, Steve Trier, Tiffany M Heaster and Amani Gillette, for valuable discussions and  
537 technical assistance over the course of this work.

538

539 **Grant Support**

540 This work is supported by R35 GM118027 to AH, R01 CA205101 to MCS, and individual fellowship  
541 from American Heart Association to VM (17POST33410970).

542

543

544 **References**

- 545 1. Murray PJ & Wynn TA (2011) Protective and pathogenic functions of macrophage subsets. *Nat*  
546 *Rev Immunol* 11(11):723-737.
- 547 2. Mills CD, Lenz LL, & Ley K (2015) Macrophages at the fork in the road to health or disease.  
548 *Frontiers in immunology* 6:59.
- 549 3. Murray PJ (2017) Macrophage Polarization. *Annual review of physiology* 79:541-566.
- 550 4. Martinez FO & Gordon S (2014) The M1 and M2 paradigm of macrophage activation: time for  
551 reassessment. *F1000prime reports* 6:13.
- 552 5. Mills CD, Thomas AC, Lenz LL, & Munder M (2014) Macrophage: SHIP of Immunity.  
553 *Frontiers in immunology* 5:620.
- 554 6. Murray PJ, *et al.* (2014) Macrophage activation and polarization: nomenclature and experimental  
555 guidelines. *Immunity* 41(1):14-20.
- 556 7. Orecchioni M, Ghosheh Y, Pramod AB, & Ley K (2019) Macrophage Polarization: Different  
557 Gene Signatures in M1(LPS+) vs. Classically and M2(LPS-) vs. Alternatively Activated  
558 Macrophages. *Frontiers in immunology* 10(1084).
- 559 8. Rath M, Muller I, Kropf P, Closs EI, & Munder M (2014) Metabolism via Arginase or Nitric  
560 Oxide Synthase: Two Competing Arginine Pathways in Macrophages. *Frontiers in immunology*  
561 5:532.
- 562 9. Tannahill GM, *et al.* (2013) Succinate is an inflammatory signal that induces IL-1beta through  
563 HIF-1alpha. *Nature* 496(7444):238-242.
- 564 10. Jha AK, *et al.* (2015) Network integration of parallel metabolic and transcriptional data reveals  
565 metabolic modules that regulate macrophage polarization. *Immunity* 42(3):419-430.
- 566 11. O'Neill LA & Pearce EJ (2016) Immunometabolism governs dendritic cell and macrophage  
567 function. *J Exp Med* 213(1):15-23.
- 568 12. Murphy MP & O'Neill LAJ (2020) How should we talk about metabolism? *Nat Immunol.*
- 569 13. Ryan DG & O'Neill LAJ (2020) Krebs Cycle Reborn in Macrophage Immunometabolism. *Annu*  
570 *Rev Immunol* 38:289-313.
- 571 14. Thapa B & Lee K (2019) Metabolic influence on macrophage polarization and pathogenesis.  
572 *BMB reports* 52(6):360-372.
- 573 15. Van den Bossche J & Saraber DL (2018) Metabolic regulation of macrophages in tissues.  
574 *Cellular Immunology* 330:54-59.
- 575 16. Stout RD & Suttles J (2004) Functional plasticity of macrophages: reversible adaptation to  
576 changing microenvironments. *J Leukoc Biol* 76(3):509-513.
- 577 17. Georgakoudi I & Quinn KP (2012) Optical imaging using endogenous contrast to assess  
578 metabolic state. *Annual review of biomedical engineering* 14:351-367.

- 579 18. Kolenc OI & Quinn KP (2019) Evaluating Cell Metabolism Through Autofluorescence Imaging  
580 of NAD(P)H and FAD. *Antioxidants & redox signaling* 30(6):875-889.
- 581 19. Blacker TS & Duchen MR (2016) Investigating mitochondrial redox state using NADH and  
582 NADPH autofluorescence. *Free radical biology & medicine* 100:53-65.
- 583 20. Chance B, Schoener B, Oshino R, Itshak F, & Nakase Y (1979) Oxidation-reduction ratio studies  
584 of mitochondria in freeze-trapped samples. NADH and flavoprotein fluorescence signals. *J Biol*  
585 *Chem* 254(11):4764-4771.
- 586 21. Walsh AJ, *et al.* (2019) Label-free Method for Classification of T cell Activation.  
587 *bioRxiv*:536813.
- 588 22. Lakowicz JR, Szmacinski H, Nowaczyk K, & Johnson ML (1992) Fluorescence lifetime imaging  
589 of free and protein-bound NADH. *Proc Natl Acad Sci U S A* 89(4):1271-1275.
- 590 23. Walsh AJ, Shah AT, Sharick JT, & Skala MC (2015) *Fluorescence Lifetime Measurements of*  
591 *NADH in Live Cells and Tissue* (Springer International Publishing, Switzerland).
- 592 24. Datta R, Heaster TM, Sharick JT, Gillette AA, & Skala MC (2020) Fluorescence lifetime imaging  
593 microscopy: fundamentals and advances in instrumentation, analysis, and applications. *Journal of*  
594 *biomedical optics* 25(7):1-43.
- 595 25. Sharick JT, *et al.* (2019) Cellular Metabolic Heterogeneity In Vivo Is Recapitulated in Tumor  
596 Organoids. *Neoplasia (New York, N.Y.)* 21(6):615-626.
- 597 26. Heaster TM, Landman BA, & Skala MC (2019) Quantitative Spatial Analysis of Metabolic  
598 Heterogeneity Across in vivo and in vitro Tumor Models. *Frontiers in oncology* 9:1144.
- 599 27. Traver D, *et al.* (2003) The zebrafish as a model organism to study development of the immune  
600 system. *Advances in immunology* 81:253-330.
- 601 28. Howe K, *et al.* (2013) The zebrafish reference genome sequence and its relationship to the human  
602 genome. *Nature* 496(7446):498-503.
- 603 29. LeBert DC & Huttenlocher A (2014) Inflammation and wound repair. *Seminars in immunology*  
604 26(4):315-320.
- 605 30. Heaster TM, Humayun M, Yu J, Beebe DJ, & Skala MC (2020) Autofluorescence imaging of 3D  
606 tumor-macrophage microscale cultures resolves spatial and temporal dynamics of macrophage  
607 metabolism. *bioRxiv*:2020.2003.2012.989301.
- 608 31. Alfonso-Garcia A, *et al.* (2016) Label-free identification of macrophage phenotype by  
609 fluorescence lifetime imaging microscopy. *Journal of biomedical optics* 21(4):46005.
- 610 32. Smokelin I, Mizzoni C, Erndt-Marino J, Kaplan D, & Georgakoudi I (2020) Optical changes in  
611 THP-1 macrophage metabolism in response to pro- and anti-inflammatory stimuli reported by  
612 label-free two-photon imaging. *Journal of biomedical optics* 25(1):1-14.
- 613 33. Gillmaier N, Gotz A, Schulz A, Eisenreich W, & Goebel W (2012) Metabolic responses of  
614 primary and transformed cells to intracellular *Listeria monocytogenes*. *PLoS One* 7(12):e52378.

- 615 34. Sauer JD, *et al.* (2010) *Listeria monocytogenes* triggers AIM2-mediated pyroptosis upon  
616 infrequent bacteriolysis in the macrophage cytosol. *Cell host & microbe* 7(5):412-419.
- 617 35. Barros-Becker F, Lam PY, Fisher R, & Huttenlocher A (2017) Live imaging reveals distinct  
618 modes of neutrophil and macrophage migration within interstitial tissues. *J Cell Sci*  
619 130(22):3801-3808.
- 620 36. Stringari C, *et al.* (2017) Multicolor two-photon imaging of endogenous fluorophores in living  
621 tissues by wavelength mixing. *Scientific reports* 7(1):3792.
- 622 37. Pelicano H, Martin DS, Xu RH, & Huang P (2006) Glycolysis inhibition for anticancer treatment.  
623 *Oncogene* 25(34):4633-4646.
- 624 38. Miskolci V, *et al.* (2019) Distinct inflammatory and wound healing responses to complex caudal  
625 fin injuries of larval zebrafish. *eLife* 8:e45976.
- 626 39. Nguyen-Chi M, *et al.* (2015) Identification of polarized macrophage subsets in zebrafish. *eLife*  
627 4:e07288.
- 628 40. Marjoram L, *et al.* (2015) Epigenetic control of intestinal barrier function and inflammation in  
629 zebrafish. *Proc Natl Acad Sci U S A* 112(9):2770-2775.
- 630 41. Jang C, Chen L, & Rabinowitz JD (2018) Metabolomics and Isotope Tracing. *Cell* 173(4):822-  
631 837.
- 632 42. Geeraerts X, Bolli E, Fendt SM, & Van Ginderachter JA (2017) Macrophage Metabolism As  
633 Therapeutic Target for Cancer, Atherosclerosis, and Obesity. *Frontiers in immunology* 8:289.
- 634 43. Palsson-McDermott EM & O'Neill LAJ (2020) Targeting immunometabolism as an anti-  
635 inflammatory strategy. *Cell Res* 30(4):300-314.
- 636 44. Szulczewski JM, *et al.* (2016) In Vivo Visualization of Stromal Macrophages via label-free  
637 FLIM-based metabolite imaging. *Scientific reports* 6:25086.
- 638 45. Hind LE, Lurier EB, Dembo M, Spiller KL, & Hammer DA (2016) Effect of M1-M2 Polarization  
639 on the Motility and Traction Stresses of Primary Human Macrophages. *Cellular and molecular*  
640 *bioengineering* 9(3):455-465.
- 641 46. Semba H, *et al.* (2016) HIF-1 $\alpha$ -PDK1 axis-induced active glycolysis plays an essential role in  
642 macrophage migratory capacity. *Nature communications* 7:11635.
- 643 47. Bojarczuk A, *et al.* (2016) *Cryptococcus neoformans* Intracellular Proliferation and Capsule Size  
644 Determines Early Macrophage Control of Infection. *Scientific reports* 6:21489.
- 645 48. Sauer JD, *et al.* (2011) The N-ethyl-N-nitrosourea-induced Goldenticket mouse mutant reveals an  
646 essential function of Sting in the in vivo interferon response to *Listeria monocytogenes* and cyclic  
647 dinucleotides. *Infection and immunity* 79(2):688-694.
- 648 49. Nakashima N, Yoshihara K, Tanaka F, & Yagi K (1980) Picosecond fluorescence lifetime of the  
649 coenzyme of D-amino acid oxidase. *J Biol Chem* 255(11):5261-5263.

- 650 50. McQuin C, *et al.* (2018) CellProfiler 3.0: Next-generation image processing for biology. *PLoS*  
651 *Biol* 16(7):e2005970.
- 652 51. Schindelin J, *et al.* (2012) Fiji: an open-source platform for biological-image analysis. *Nat*  
653 *Methods* 9(7):676-682.
- 654 52. RStudio Team (2015) RStudio: Integrated Development for R. (RStudio, Inc., Boston, MA).
- 655 53. R Core Team (2019) R: A language and environment for statistical computing. (R Foundation for  
656 Statistical Computing, Vienna, Austria).
- 657

658 **Figure legends**

659 **Figure 1. Fluorescence lifetime imaging of NAD(P)H and FAD detects predicted changes in the**  
660 **optical redox ratio in the context of *in vitro* infection of primary macrophages.** Mouse bone marrow  
661 derived macrophages were infected with mCherry-labeled *Listeria monocytogenes* (*Lm*) at MOI 2, and  
662 FLIM of NAD(P)H and FAD was performed on live cells at 5-6 hours post infection (hpi). A)  
663 Representative images of mCherry (to show presence of bacteria), optical redox ratio, and NAD(P)H and  
664 FAD mean lifetimes ( $\tau_m$ ) are shown for uninfected control or *Lm*-infected macrophages; scale bar = 50  
665  $\mu\text{m}$ . Quantitative analysis of B) optical redox ratio, C) NAD(P)H and D) FAD mean lifetimes ( $\tau_m = \alpha_1\tau_1$   
666  $+ \alpha_2\tau_2$ ) are shown; quantitative analysis of other associated lifetime endpoints ( $\alpha_1$ ,  $\tau_1$ ,  $\tau_2$ ) are included in  
667 Figure 1 supplement. The diffuse cytoplasmic fluorescence in the mCherry images is likely due to FAD  
668 autofluorescence (44). mCherry expression in bacteria was used to subtract from lifetime images in order  
669 to exclude metabolic changes in the pathogen from that of macrophages. Results from 3 independent  
670 repeats are shown; sample size for each repeat is included in Figure 1 supplement. Each data point  
671 represent a macrophage and the data for each condition is displayed by a composite dotplot and boxplot;  
672 each repeat is displayed by a different color in the dotplot, showing mean with 95% CI; boxplots show  
673 median (central line), first and third quartiles (lower and upper lines), and the Tukey method was  
674 employed to create the whiskers (the farthest data points that are no further than 1.5 times the interquartile  
675 range); data points beyond whiskers (refer to dotplot) are considered outliers. Statistical comparison was  
676 performed by general linear model; ns = not significant.

677 **Figure 2. Inhibition of glycolysis produces predicted changes in the optical redox ratio of**  
678 **macrophages at the simple tail wound.** Tail fin transection distal to the notochord was performed using  
679 transgenic zebrafish larvae (*Tg(mpeg1:mCherry-CAAX)* that labels macrophages in the plasma membrane  
680 with mCherry) at 3 days post fertilization (dpf), and FLIM of NAD(P)H and FAD was performed on live  
681 larvae at 3-6 hours post tail transection (hptt) that were either untreated (control) or treated with 5 mM 2-  
682 DG (glycolysis inhibitor). A) Schematic showing area where wounding (red line) and imaging (green  
683 box) was performed. B) Representative images of mCherry (to show macrophages), optical redox ratio,  
684 and NAD(P)H and FAD mean lifetimes ( $\tau_m$ ) are shown for control or treated tail wounds; macrophages in  
685 mCherry channel were outlined with dashed lines and the area was overlaid in the optical redox ratio and  
686 lifetime images to show corresponding location; scale bar = 50  $\mu\text{m}$ . Quantitative analysis of C) optical  
687 redox ratio, D) NAD(P)H and E) FAD mean lifetimes ( $\tau_m = \alpha_1\tau_1 + \alpha_2\tau_2$ ) are shown; quantitative analysis  
688 of other associated lifetime endpoints ( $\alpha_1$ ,  $\tau_1$ ,  $\tau_2$ ) are included in Figure 2 supplement. Results from 2  
689 biological repeats are shown; sample size for each repeat is included in Figure 2 supplement. Each data  
690 point represent a macrophage and the data for each condition is displayed by a composite dotplot and

691 boxplot; each repeat is displayed by a different color in the dotplot; boxplots show median (central line),  
692 first and third quartiles (lower and upper lines), and the Tukey method was employed to create the  
693 whiskers (the farthest data points that are no further than 1.5 times the interquartile range); data points  
694 beyond whiskers (refer to dotplot) are considered outliers. Statistical comparison was performed using a  
695 general linear model with cluster-robust standard errors to account for multiple macrophages measured  
696 per larvae, thereby statistical conclusions are shown in a table below the graphs. The optical redox ratio  
697 and  $\tau_m$  were log-transformed prior to analysis. Estimated means with 95% CI are included in Figure 2  
698 supplement.

699 **Figure 3. Fluorescence lifetime imaging of NAD(P)H detects metabolic changes in TNF $\alpha$ - and**  
700 **TNF $\alpha$ + macrophages at the infected tail wound.** Tail fin transection distal to the notochord was  
701 performed using double transgenic zebrafish larvae (*Tg(tnf:GFP) x Tg(mpeg1:mCherry-CAAX)*, a TNF $\alpha$   
702 reporter line in combination with a line that labels macrophages in the plasma membrane with mCherry)  
703 at 3 days post fertilization (dpf) in the absence or presence of *Listeria monocytogenes* (*Lm*). FLIM of  
704 NAD(P)H was performed on live larvae at 48 hours post wound (hpw) (Figure 2A). A) Representative  
705 images of mCherry expression to show macrophages, GFP to show TNF $\alpha$  expression and NAD(P)H  
706 mean lifetime ( $\tau_m$ ) are shown for control or infected tail wounds; macrophages in mCherry channel were  
707 outlined with dashed lines and the area was overlaid in GFP and lifetime images to show corresponding  
708 location; in the infected condition only few macrophages are outlined as examples; scale bar = 50  $\mu$ m.  
709 Quantitative analysis of B) NAD(P)H mean lifetime ( $\tau_m = \alpha_1\tau_1 + \alpha_2\tau_2$ ) and C) alpha 1 ( $\alpha_1$ ), fractional  
710 component of free NAD(P)H are shown; quantitative analysis of other associated lifetime endpoints ( $\tau_1$ ,  
711  $\tau_2$ ) are included in Figure 3 supplement. Results from 3 biological repeats are shown; sample size for each  
712 repeat is included in Figure 3 supplement. Each data point represent a macrophage and the data for each  
713 condition is displayed by a composite dotplot and boxplot; each repeat is displayed by a different color in  
714 the dotplot; boxplots show median (central line), first and third quartiles (lower and upper lines), and the  
715 Tukey method was employed to create the whiskers (the farthest data points that are no further than 1.5  
716 times the interquartile range); data points beyond whiskers (refer to dotplot) are considered outliers.  
717 Statistical comparison was performed using a general linear model with cluster-robust standard errors to  
718 account for multiple macrophages measured per larvae, thereby statistical conclusions are shown in a  
719 table below the graphs. The lifetime endpoints were log-transformed prior to analysis. Interaction  
720 between treatment and GFP expression was included to analyze whether either factor modified the effect  
721 of the other; no interaction was found. Estimated means with 95% CI are included in Figure 3  
722 supplement.



723 **Figure 4. Fluorescence lifetime imaging of NAD(P)H and FAD detects metabolic changes in**  
724 **macrophages at the infected tail wound.** Tail fin transection distal to the notochord was performed  
725 using transgenic zebrafish larvae (*Tg(mpeg1:mCherry-CAAX)* that labels macrophages in the plasma  
726 membrane with mCherry) at 3 days post fertilization (dpf) in the absence or presence of *Listeria*  
727 *monocytogenes* (*Lm*). FLIM of NAD(P)H and FAD was performed on live larvae at 48 hours post wound  
728 (hpw) (Figure 2A). A) Representative images of mCherry expression to show macrophages, optical redox  
729 ratio, and NAD(P)H and FAD mean lifetimes ( $\tau_m$ ) are shown for control or infected tail wounds;  
730 macrophages were outlined with dashed lines and the area was overlaid in the optical redox ratio and  
731 lifetime images to show corresponding area; in the infected condition only few macrophages are outlined  
732 as examples; scale bar = 50  $\mu$ m. Quantitative analysis of B) optical redox ratio, C) NAD(P)H and D) FAD  
733 mean lifetimes ( $\tau_m = \alpha_1\tau_1 + \alpha_2\tau_2$ ) are shown; quantitative analysis of other associated lifetime endpoints  
734 ( $\alpha_1, \tau_1, \tau_2$ ) are included in Figure 4 supplement. Results from 3 biological repeats are shown; sample size  
735 for each repeat is included in Figure 4 supplement. Each data point represent a macrophage and the data  
736 for each condition is displayed by a composite dotplot and boxplot; each repeat is displayed by a different  
737 color in the dotplot; boxplots show median (central line), first and third quartiles (lower and upper lines),  
738 and the Tukey method was employed to create the whiskers (the farthest data points that are no further  
739 than 1.5 times the interquartile range); data points beyond whiskers (refer to dotplot) are considered  
740 outliers. Statistical comparison was performed using a general linear model with cluster-robust standard  
741 errors to account for multiple macrophages measured per larvae, thereby statistical conclusions are shown  
742 in a table below the graphs. Log transformation was applied to  $\tau_m$  prior to analysis. Estimated means with  
743 95% CI are included in Figure 4 supplement.

744 **Figure 5. Fluorescence lifetime imaging of NAD(P)H and FAD detects temporal changes in the**  
745 **metabolic activity of macrophages at sterile tail wounds.** Tail fin transection (Tt) or thermal injury  
746 (Burn) distal to the notochord was performed using transgenic zebrafish larvae (*Tg(mpeg1:mCherry-*  
747 *CAAX)* that labels macrophages in the plasma membrane with mCherry) at 3 days post fertilization (dpf).  
748 FLIM of NAD(P)H and FAD was performed on live larvae at 24 and 72 hours post wound (hpw) (Figure  
749 2A). A) Representative images of mCherry expression to show macrophages, optical redox ratio, and  
750 NAD(P)H and FAD mean lifetimes ( $\tau_m$ ) are shown for Tt or Burn wounds; macrophages were outlined  
751 with dashed lines and the area was overlaid in the optical redox ratio and lifetime images to show  
752 corresponding location of macrophages; scale bar = 50  $\mu$ m. Quantitative analysis of B) optical redox  
753 ratio, C) NAD(P)H and D) FAD mean lifetimes ( $\tau_m = \alpha_1\tau_1 + \alpha_2\tau_2$ ) are shown; quantitative analysis of  
754 other associated lifetime endpoints ( $\alpha_1, \tau_1, \tau_2$ ) are included in Figure 5 supplement. Results from 3  
755 biological repeats are shown; sample size for each repeat is included in Figure 5 supplement. Each data

756 point represent a macrophage and the data for each condition is displayed by a composite dotplot and  
757 boxplot; each repeat is displayed by a different color in the dotplot; boxplots show median (central line),  
758 first and third quartiles (lower and upper lines), and the Tukey method was employed to create the  
759 whiskers (the farthest data points that are no further than 1.5 times the interquartile range); data points  
760 beyond whiskers (refer to dotplot) are considered outliers. Statistical comparison was performed using a  
761 general linear model with cluster-robust standard errors to account for multiple macrophages measured  
762 per larvae, thereby statistical conclusions are shown in a table below the graphs. Log transformation was  
763 applied to  $\tau_m$  prior to analysis. Interaction between treatment and time was included to analyze whether  
764 either factor modified the effect of the other; Strong interaction was detected for the optical redox ratio.  
765 E) Tail fin tissue was collected distal to the caudal vein/artery loop (green box) 24 h following either tail  
766 fin transection or thermal injury distal to the notochord (red line) for mass spec analysis of small  
767 metabolites to compare the global trend of changes in redox metabolites with that measured by FLIM;  
768 metabolomics data shown in F and G are from 4 biological repeats. F) metabolite abundance measured by  
769 either fluorescence intensity (FLIM) or mass spec in transection sample was normalized by that in burn or  
770 G) was used to calculate the redox ratio in transection (Tt) or burn samples. We included NADPH  
771 abundance in the redox ratio calculated using Mass Spec measurements. \*NADPH and NADH intensities  
772 were not collected separately by FLIM as their fluorescence spectra overlap, thereby measured  
773 collectively. Estimated means with 95% CI are included in Figure 5 supplement.

774

### 775 **Figure supplement legends**

776 **Figure 1 supplement.** Other NAD(P)H and FAD fluorescence lifetime components measured during *in*  
777 *vitro* *Listeria monocytogenes* (*Lm*) infection of primary mouse macrophages, associated with Figure 1.  
778 Quantitative analysis of A) alpha1 ( $\alpha_1$ ), fractional component of free NAD(P)H; B) tau1 ( $\tau_1$ ), free/short  
779 lifetime of NAD(P)H; C) tau2 ( $\tau_2$ ), bound/long lifetime of NAD(P)H; D) alpha1 ( $\alpha_1$ ), fractional  
780 component of bound FAD; E) tau1 ( $\tau_1$ ), bound/short lifetime of FAD; F) tau2 ( $\tau_2$ ), free/long lifetime of  
781 FAD. Each data point represent a macrophage and the data for each condition is displayed by a composite  
782 dotplot and boxplot; each repeat (n=3) is displayed by a different color in the dotplot, showing mean with  
783 95% CI; boxplots show median (central line), first and third quartiles (lower and upper lines), and the  
784 Tukey method was employed to create the whiskers; data points beyond whiskers (refer to dotplot) are  
785 considered outliers. Statistical comparison was performed by general linear model; ns = not significant.  
786 G) Sample size of data set shown in Figure 1 and this supplement.

787 **Figure 2 supplement.** Other NAD(P)H and FAD fluorescence lifetime components measured in  
788 macrophages at simple tail wounds of zebrafish larvae treated with glycolysis inhibitor (2-DG), associated  
789 with Figure 2. Quantitative analysis of A) alpha1 ( $\alpha_1$ ), fractional component of free NAD(P)H; B) tau1  
790 ( $\tau_1$ ), free/short lifetime of NAD(P)H; C) tau2 ( $\tau_2$ ), bound/long lifetime of NAD(P)H; D) alpha1 ( $\alpha_1$ ),  
791 fractional component of bound FAD; E) tau1 ( $\tau_1$ ), bound/short lifetime of FAD; F) tau2 ( $\tau_2$ ), free/long  
792 lifetime of FAD. Each data point represent a macrophage and the data for each condition is displayed by a  
793 composite dotplot and boxplot; each repeat (n=2) is displayed by a different color in the dotplot; boxplots  
794 show median (central line), first and third quartiles (lower and upper lines), and the Tukey method was  
795 employed to create the whiskers; data points beyond whiskers (refer to dotplot) are considered outliers.  
796 Statistical comparison was performed using a general linear model with cluster-robust standard errors to  
797 account for multiple macrophages measured per larvae, thereby statistical conclusions are shown in a  
798 table below the graphs. All lifetime endpoints were log-transformed prior to analysis. G) Sample size of  
799 data set shown in Figure 2 and this supplement. H) Estimated means with 95% CI; ORR = optical redox  
800 ratio.

801 **Figure 3 supplement.** Other NAD(P)H fluorescence lifetime components measured in TNF $\alpha$ - and  
802 TNF $\alpha$ + macrophages at infected tail wounds of zebrafish larvae, associated with Figure 3. Quantitative  
803 analysis of A) tau1 ( $\tau_1$ ), free/short lifetime of NAD(P)H; B) tau2 ( $\tau_2$ ), bound/long lifetime of NAD(P)H.  
804 Each data point represent a macrophage and the data for each condition is displayed by a composite  
805 dotplot and boxplot; each repeat (n=3) is displayed by a different color in the dotplot; boxplots show  
806 median (central line), first and third quartiles (lower and upper lines), and the Tukey method was  
807 employed to create the whiskers; data points beyond whiskers (refer to dotplot) are considered outliers.  
808 Statistical comparison was performed using a general linear model with cluster-robust standard errors to  
809 account for multiple macrophages measured per larvae, thereby statistical conclusions are shown in a  
810 table below the graphs. The lifetime endpoints were log-transformed prior to analysis. Interaction  
811 between treatment and GFP expression was included to analyze whether either factor modified the effect  
812 of the other; no interaction was found. C) Sample size of data set shown in Figure 3 and this supplement.  
813 D) Estimated means with 95% CI.

814 **Figure 4 supplement.** Other NAD(P)H and FAD fluorescence lifetime components measured in  
815 macrophages at infected tail wounds of zebrafish larvae, associated with Figure 4. Quantitative analysis of  
816 A) alpha1 ( $\alpha_1$ ), fractional component of free NAD(P)H; B) tau1 ( $\tau_1$ ), free/short lifetime of NAD(P)H; C)  
817 tau2 ( $\tau_2$ ), bound/long lifetime of NAD(P)H; D) alpha1 ( $\alpha_1$ ), fractional component of bound FAD; E) tau1  
818 ( $\tau_1$ ), bound/short lifetime of FAD; F) tau2 ( $\tau_2$ ), free/long lifetime of FAD. Each data point represent a

819 macrophage and the data for each condition is displayed by a composite dotplot and boxplot; each repeat  
820 ( $n=3$ ) is displayed by a different color in the dotplot; boxplots show median (central line), first and third  
821 quartiles (lower and upper lines), and the Tukey method was employed to create the whiskers; data points  
822 beyond whiskers (refer to dotplot) are considered outliers. Statistical comparison was performed using a  
823 general linear model with cluster-robust standard errors to account for multiple macrophages measured  
824 per larvae, thereby statistical conclusions are shown in a table below the graphs. Log transformation was  
825 applied to  $\tau_1$  and  $\tau_2$  prior to analysis. G) Sample size of data set shown in Figure 4 and this supplement.  
826 H) Estimated means with 95% CI; ORR = optical redox ratio.

827 **Figure 5 supplement.** Other NAD(P)H and FAD fluorescence lifetime components measured in  
828 macrophages at sterile tail wounds of zebrafish larvae, associated with Figure 5. Quantitative analysis of  
829 A)  $\alpha_1$  ( $\alpha_1$ ), fractional component of free NAD(P)H; B)  $\tau_1$  ( $\tau_1$ ), free/short lifetime of NAD(P)H; C)  
830  $\tau_2$  ( $\tau_2$ ), bound/long lifetime of NAD(P)H; D)  $\alpha_1$  ( $\alpha_1$ ), fractional component of bound FAD; E)  $\tau_1$   
831 ( $\tau_1$ ), bound/short lifetime of FAD; F)  $\tau_2$  ( $\tau_2$ ), free/long lifetime of FAD. Each data point represent a  
832 macrophage and the data for each condition is displayed by a composite dotplot and boxplot; each repeat  
833 ( $n=3$ ) is displayed by a different color in the dotplot; boxplots show median (central line), first and third  
834 quartiles (lower and upper lines), and the Tukey method was employed to create the whiskers; data points  
835 beyond whiskers (refer to dotplot) are considered outliers. Statistical comparison was performed using a  
836 general linear model with cluster-robust standard errors to account for multiple macrophages measured  
837 per larvae, thereby statistical conclusions are shown in a table below the graphs. Log transformation was  
838 applied to  $\tau_1$  and  $\tau_2$  prior to analysis. Interaction between treatment and time was included to analyze  
839 whether either factor modified the effect of the other; weak interaction was detected for NAD(P)H  $\tau_1$ . G)  
840 Sample size of data set shown in Figure 5 and this supplement. H) Estimated means with 95% CI; ORR =  
841 optical redox ratio.

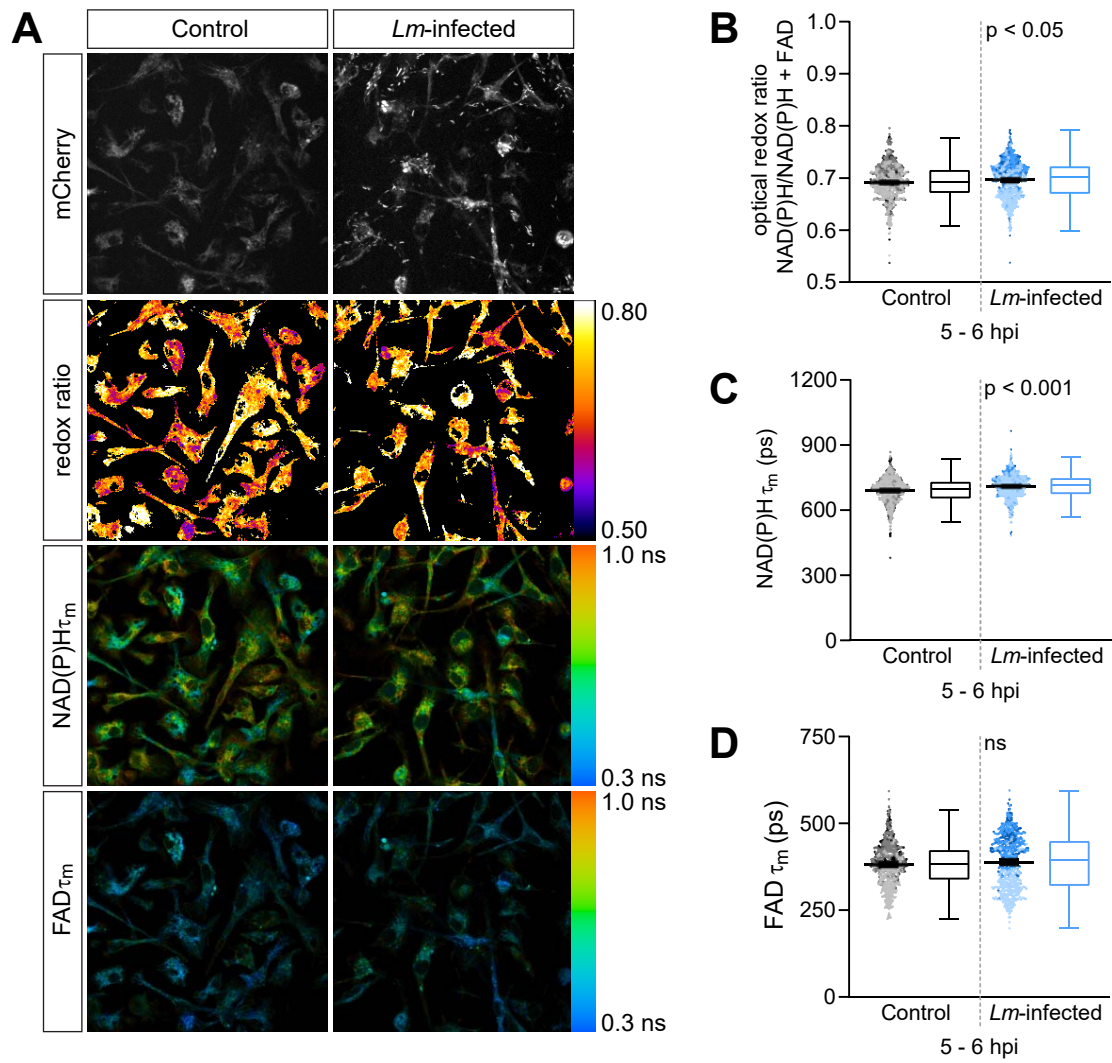

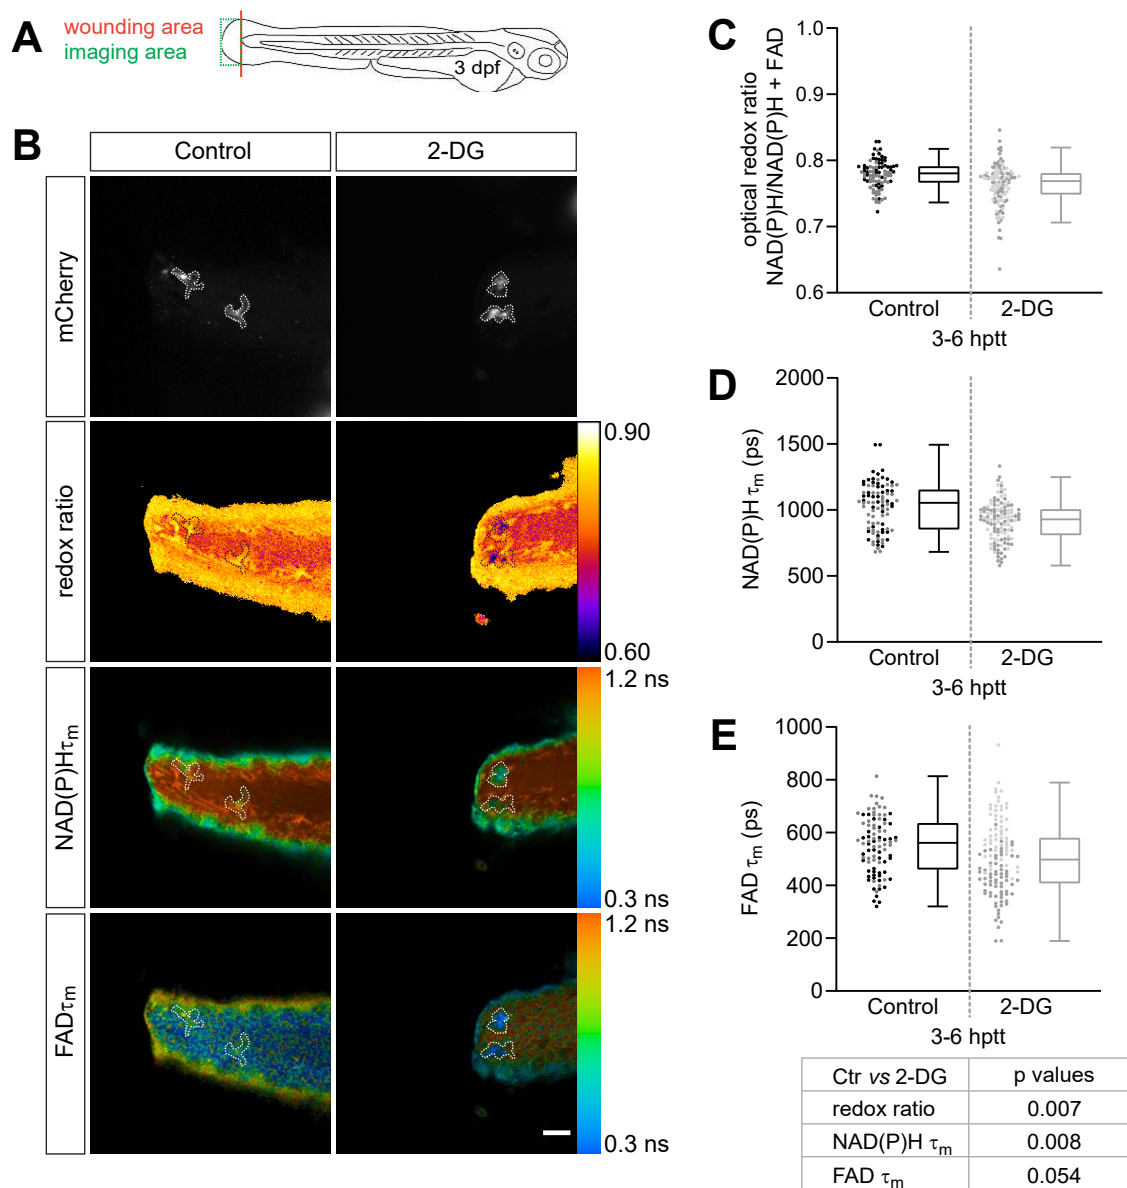



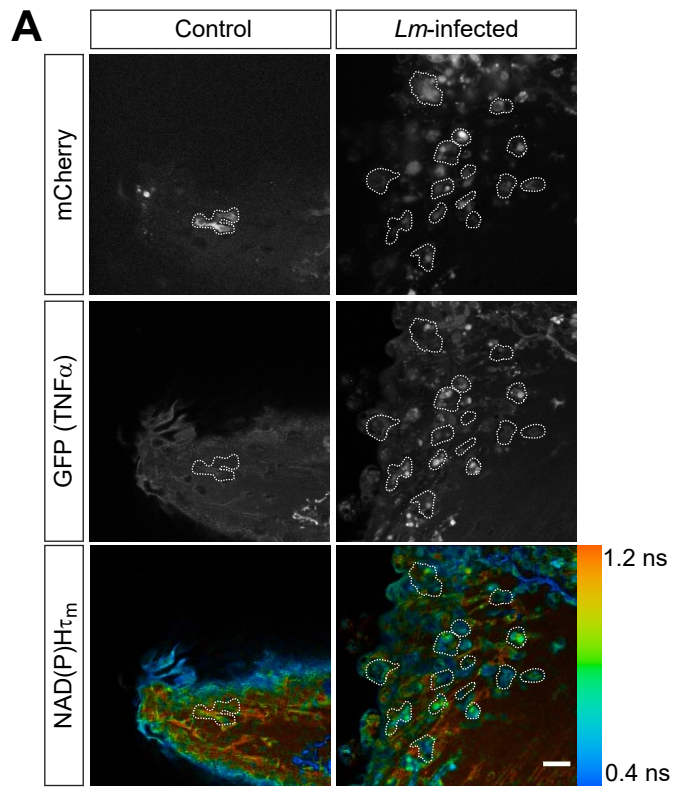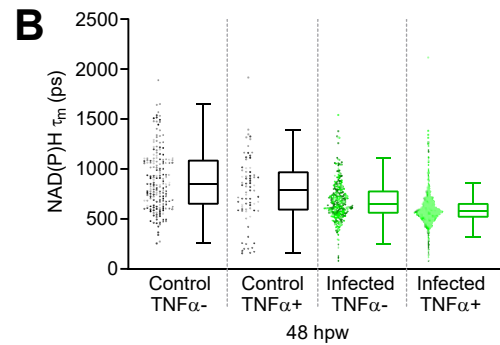

| Nτ <sub>m</sub> p values | Ctr TNFα+ | Inf TNFα- |
|--------------------------|-----------|-----------|
| Ctr TNFα- vs             | 0.0024    | 0.0075    |
| Inf TNFα+ vs             | 0.0075    | 0.0024    |

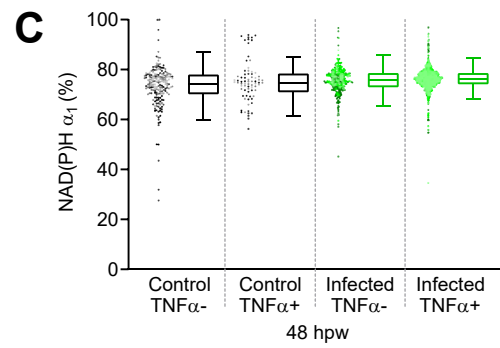

| Nα <sub>1</sub> p values | Ctr TNFα+ | Inf TNFα- |
|--------------------------|-----------|-----------|
| Ctr TNFα- vs             | 0.2452    | 0.0563    |
| Inf TNFα+ vs             | 0.0563    | 0.2452    |



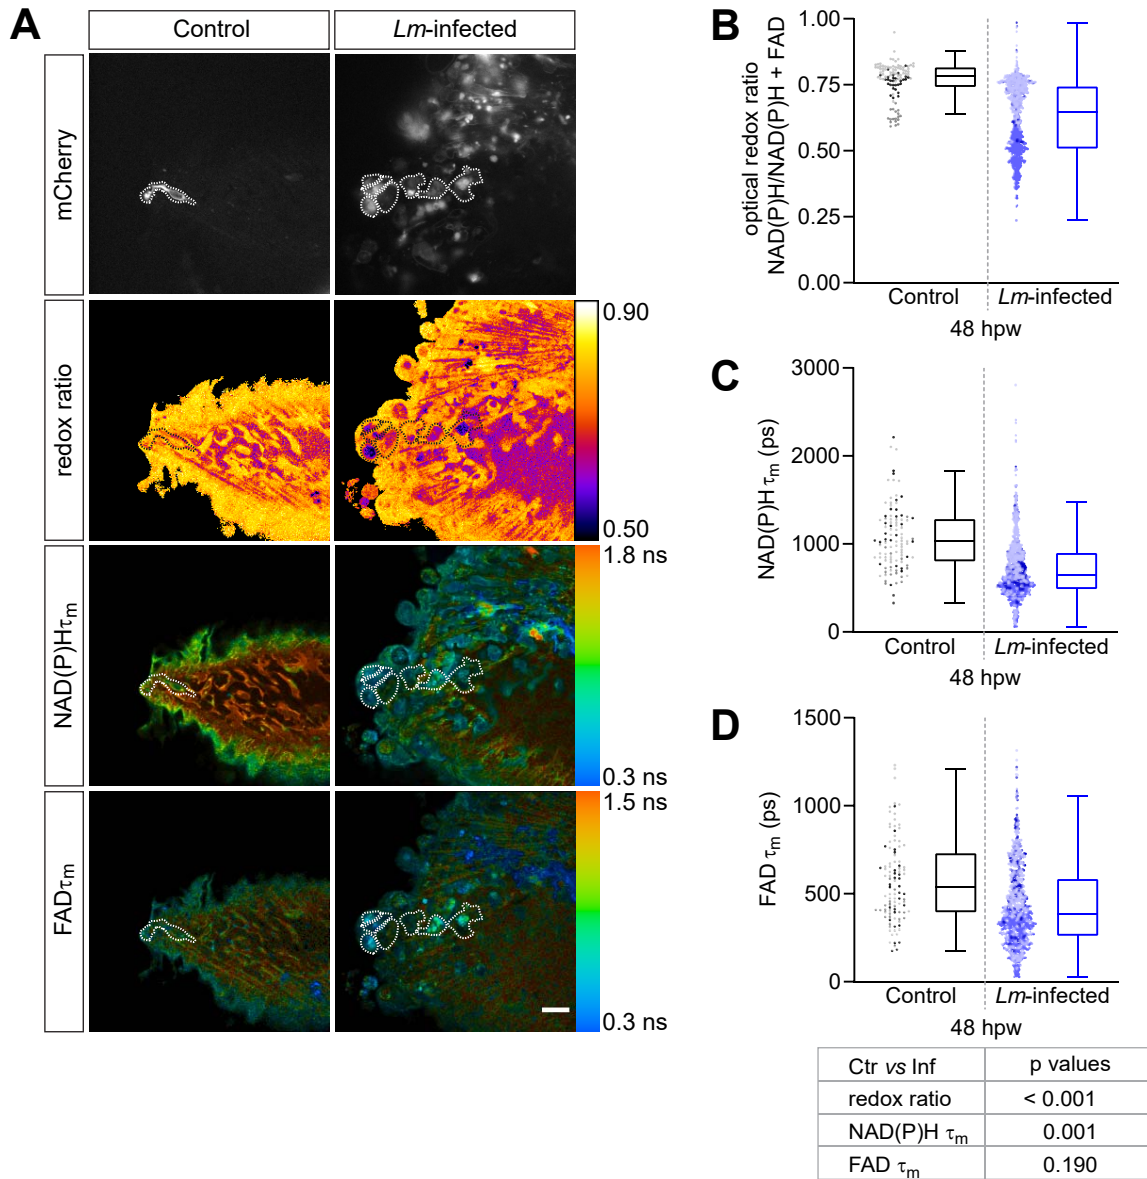

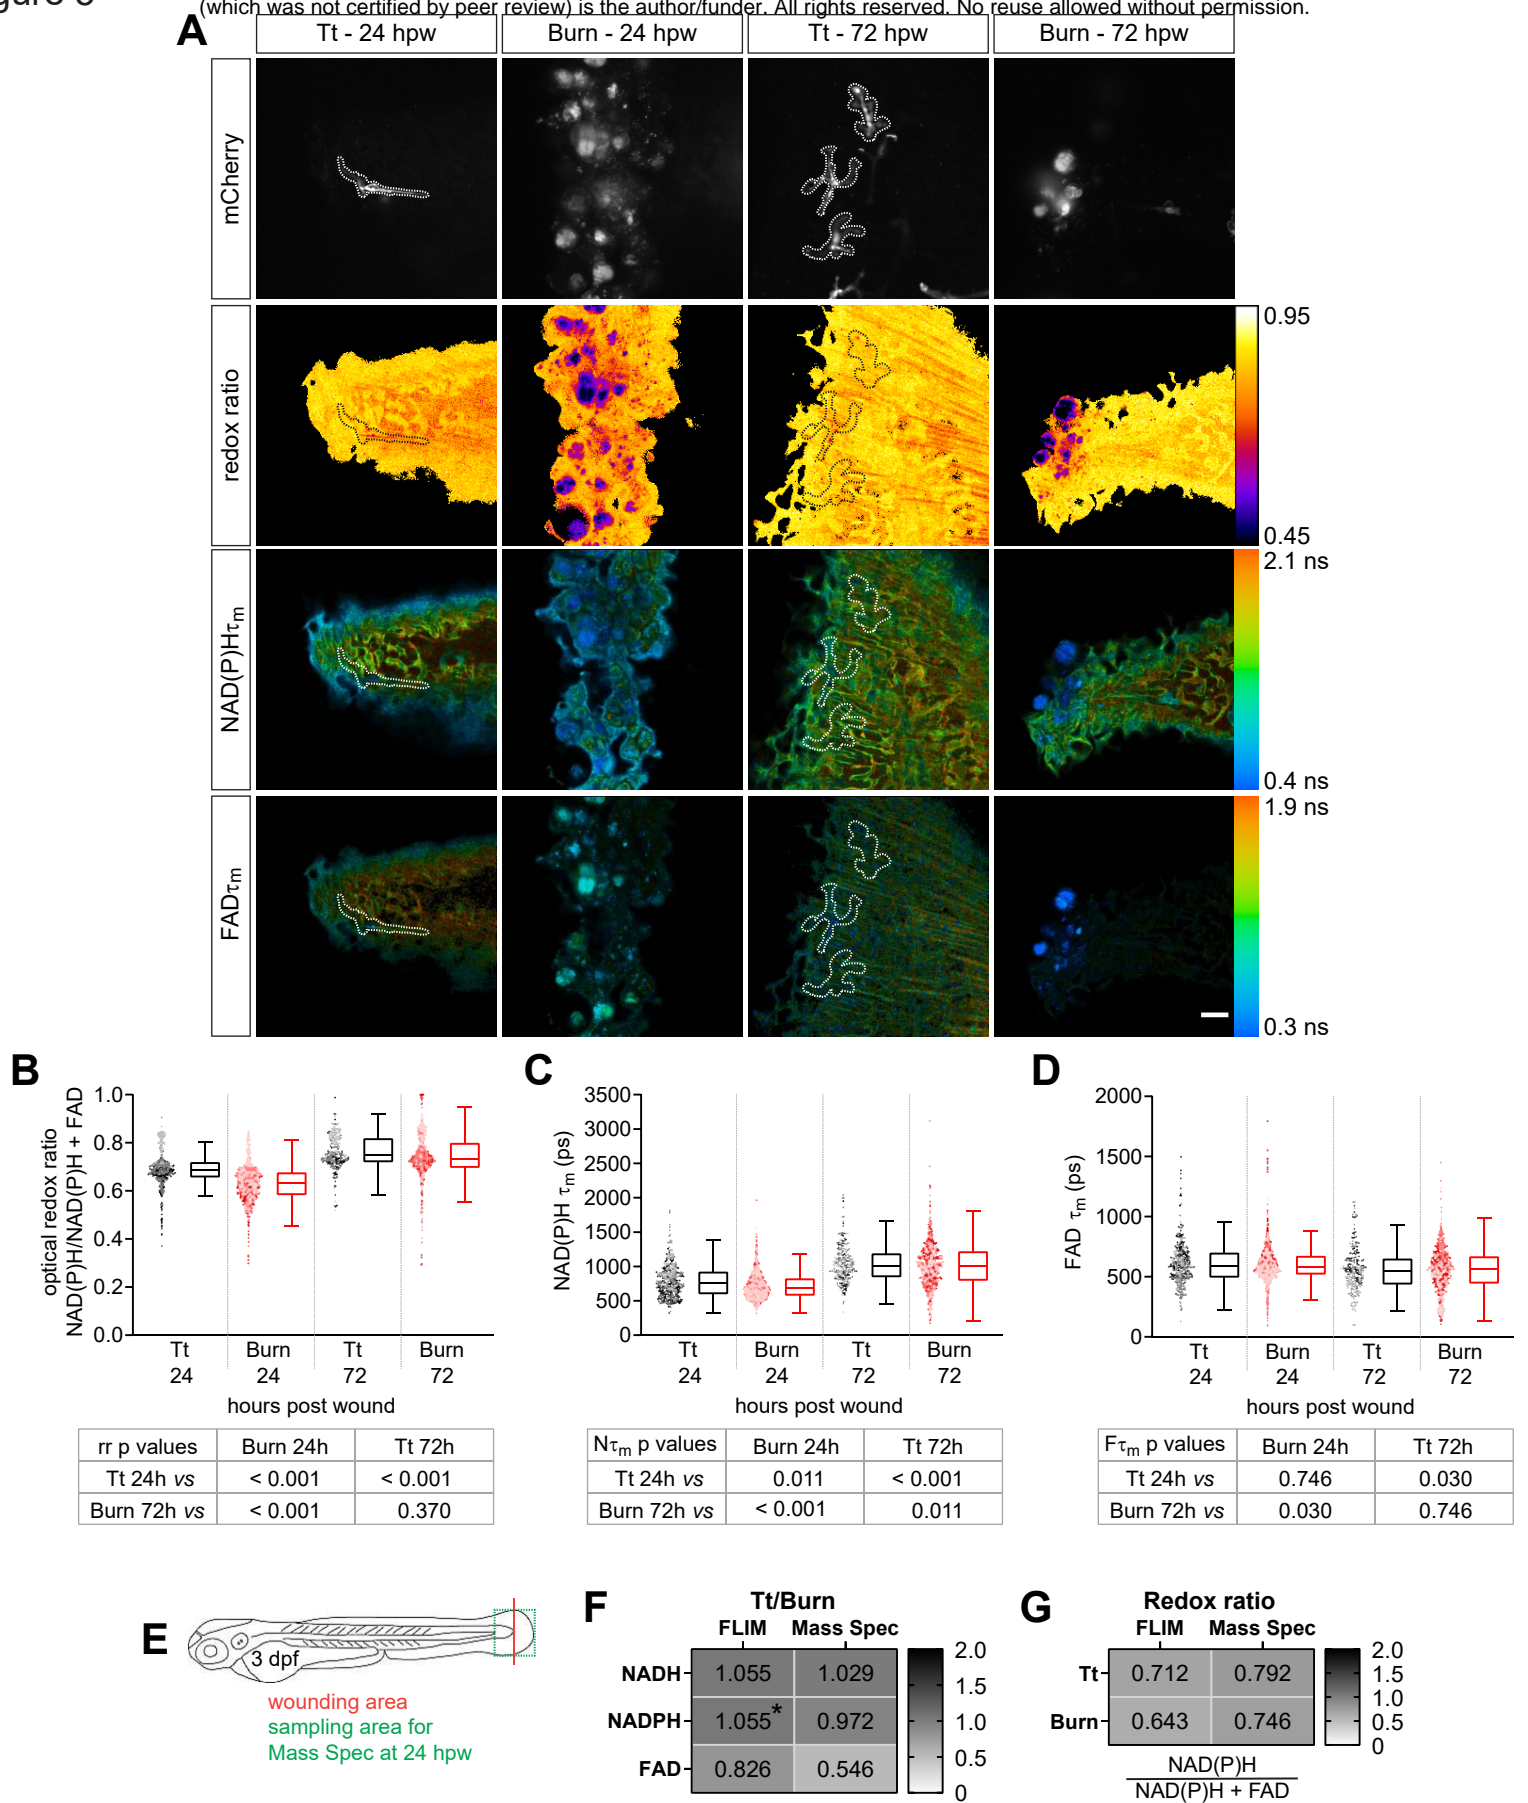

**Table 1.** Summary of changes in optical redox ratio and NAD(P)H lifetime endpoints.

|                    | <i>in vitro</i><br><i>Lm</i> -infection <sup>1</sup> | 2-DG <sup>2</sup> | <i>Lm</i> -infected wound <sup>2</sup> |                | <i>Lm</i> -infected<br>wound <sup>2</sup> | Burn wound <sup>2</sup> |     |
|--------------------|------------------------------------------------------|-------------------|----------------------------------------|----------------|-------------------------------------------|-------------------------|-----|
|                    |                                                      |                   | TNF $\alpha$ -                         | TNF $\alpha$ + |                                           | 24h                     | 72h |
| Redox ratio        | ↑                                                    | ↓                 | na                                     | na             | ↓                                         | ↓                       | nd  |
| NAD(P)H $\tau_m$   | ↑                                                    | ↓                 | ↓                                      | ↓              | ↓                                         | ↓                       | ↓   |
| NAD(P)H $\tau_1$   | ↑                                                    | ↓                 | ↓                                      | ↓              | ↓                                         | ↓                       | nd  |
| NAD(P)H $\tau_2$   | ↑                                                    | ↓                 | ↓                                      | ↓              | ↓                                         | ↓                       | nd  |
| NAD(P)H $\alpha_1$ | ↓                                                    | ↑                 | ↑                                      | ↑              | ↑                                         | ↑                       | ↑   |

Changes in treated samples are shown relative to respective controls. Control = 1-uninfected BMDM, 2-tail fin transection wound (uninfected); na = not applicable; nd = not different.

Figure 1 supplement

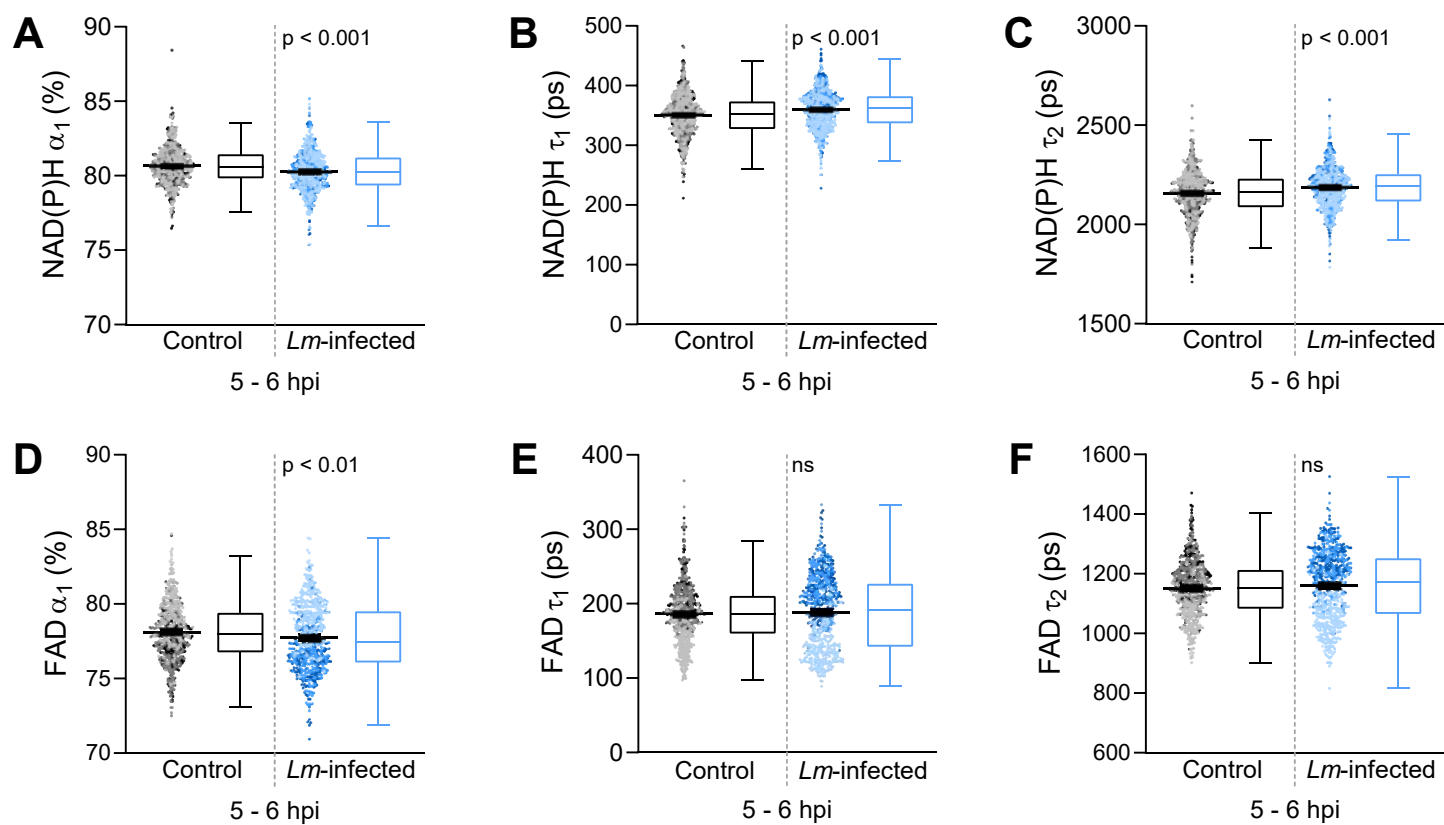

**G**

| in vitro BMDM infection | R1  | R2  | R3  | Total |
|-------------------------|-----|-----|-----|-------|
| Control (uninfected)    | 209 | 165 | 188 | 562   |
| <i>Lm</i> -infected     | 192 | 131 | 217 | 540   |

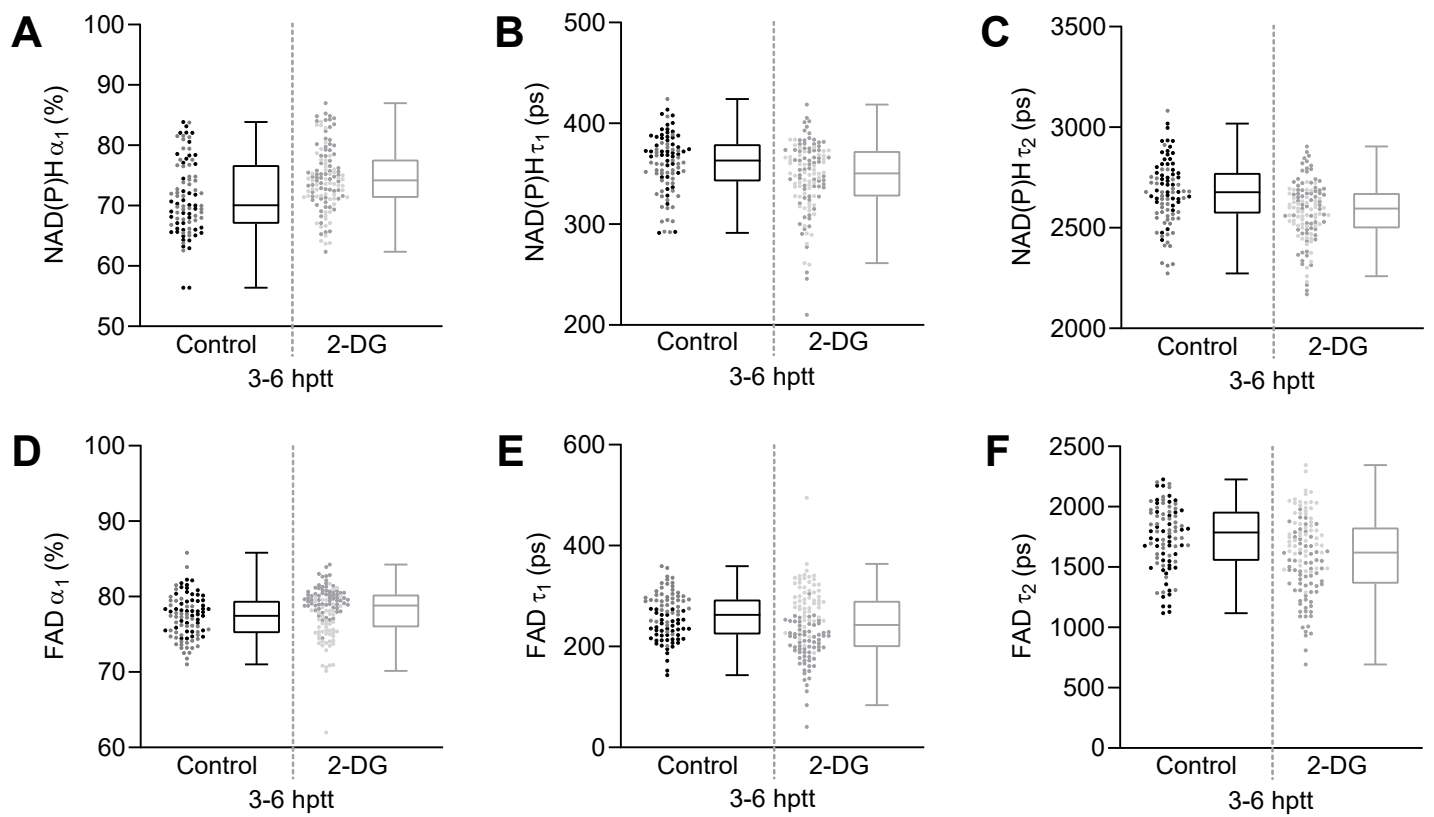

| p values     | NAD(P)H $\alpha_1$ | NAD(P)H $\tau_1$ | NAD(P)H $\tau_2$ | FAD $\alpha_1$ | FAD $\tau_1$ | FAD $\tau_2$ |
|--------------|--------------------|------------------|------------------|----------------|--------------|--------------|
| Ctrl vs 2-DG | 0.018              | 0.067            | 0.004            | 0.458          | 0.094        | 0.026        |

| zebrafish tail wound +/- 2-DG | R1    |        | R2    |        | Total |        |
|-------------------------------|-------|--------|-------|--------|-------|--------|
|                               | cells | larvae | cells | larvae | cells | larvae |
| Control                       | 44    | 4      | 46    | 5      | 90    | 9      |
| 2-DG                          | 68    | 4      | 55    | 5      | 123   | 9      |

|         | NAD(P)H $\tau_m$ (ps) | NAD(P)H $\alpha_1$ (%) | NAD(P)H $\tau_1$ (ps) | NAD(P)H $\tau_2$ (ps) | ORR               |
|---------|-----------------------|------------------------|-----------------------|-----------------------|-------------------|
| Control | 1007 (957, 1059)      | 71.2 (69.8, 72.6)      | 358 (347, 370)        | 2668 (2619, 2718)     | 0.78 (0.77, 0.78) |
| 2-DG    | 904 (855, 955)        | 74.2 (72.3, 76.3)      | 344 (332, 355)        | 2569 (2531, 2608)     | 0.76 (0.75, 0.77) |
|         | FAD $\tau_m$ (ps)     | FAD $\alpha_1$ (%)     | FAD $\tau_1$ (ps)     | FAD $\tau_2$ (ps)     |                   |
| Control | 538 (502, 577)        | 77.3 (76.4, 78.2)      | 255 (241, 269)        | 1720 (1626, 1819)     |                   |
| 2-DG    | 489 (457, 523)        | 77.8 (76.7, 78.9)      | 238 (223, 253)        | 1574 (1496, 1656)     |                   |

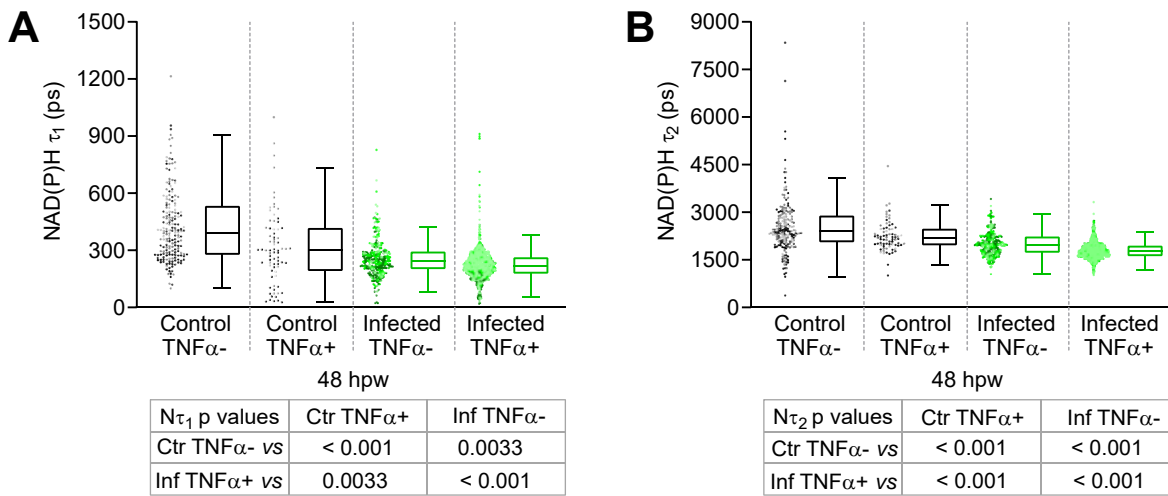

**C**

| zebrafish <i>Lm</i> -infected tail wound with TNF reporter | R1    |        | R2    |        | R3    |        | Total |        |
|------------------------------------------------------------|-------|--------|-------|--------|-------|--------|-------|--------|
|                                                            | cells | larvae | cells | larvae | cells | larvae | cells | larvae |
| Control TNF-                                               | 88    | 6      | 58    | 5      | 38    | 5      | 184   | 16     |
| Control TNF+                                               | 40    | 6      | 24    | 4      | 11    | 5      | 75    | 15     |
| Infected TNF-                                              | 154   | 5      | 69    | 6      | 35    | 4      | 258   | 15     |
| Infected TNF+                                              | 309   | 5      | 258   | 6      | 222   | 4      | 789   | 15     |

**D**

|                          | NAD(P)H $\tau_m$ (ps) | NAD(P)H $\alpha_1$ (%) | NAD(P)H $\tau_1$ (ps) | NAD(P)H $\tau_2$ (ps)   |
|--------------------------|-----------------------|------------------------|-----------------------|-------------------------|
| Control GFP-             | 667.9 (609.5, 732.0)  | 75.4 (74.2, 76.7)      | 271.5 (243.4, 302.8)  | 1966.2 (1872.8, 2064.3) |
| Control GFP+             | 840.4 (742.3, 951.5)  | 73.3 (71.6, 75.0)      | 385.5 (329.8, 450.6)  | 2417.0 (2292.5, 2548.2) |
| <i>Lm</i> -infected GFP- | 574.9 (540.2, 611.9)  | 76.3 (75.2, 77.3)      | 210.8 (194.2, 228.9)  | 1779.4 (1711.2, 1850.3) |
| <i>Lm</i> -infected GFP+ | 723.4 (614.8, 851.2)  | 74.1 (72.0, 76.3)      | 299.3 (237.2, 377.7)  | 2187.4 (2060.0, 2322.6) |

Figure 4 supplement

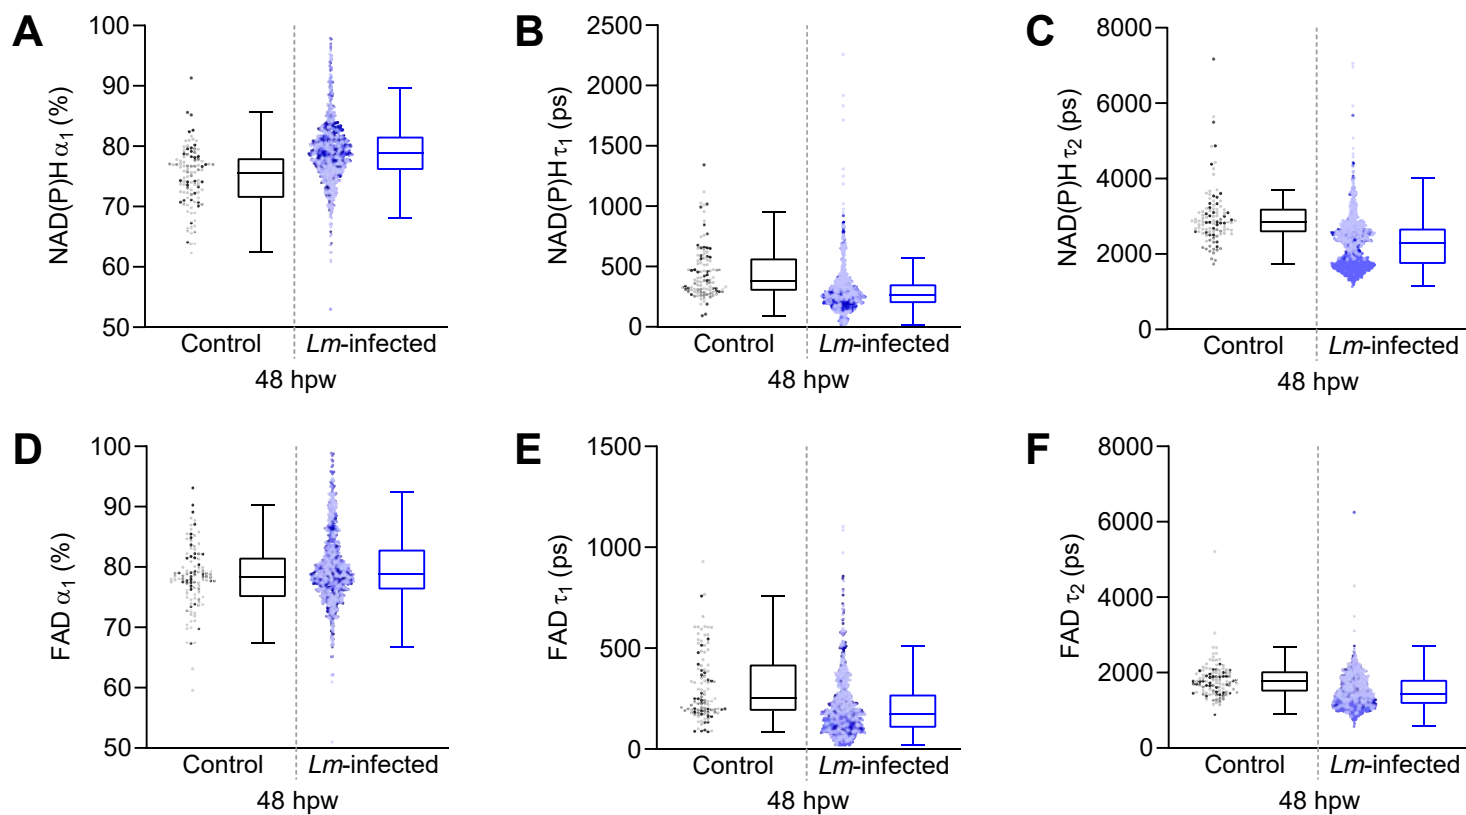

| p values    | NAD(P)H $\alpha_1$ | NAD(P)H $\tau_1$ | NAD(P)H $\tau_2$ | FAD $\alpha_1$ | FAD $\tau_1$ | FAD $\tau_2$ |
|-------------|--------------------|------------------|------------------|----------------|--------------|--------------|
| Ctrl vs Inf | 0.001              | 0.004            | < 0.001          | 0.552          | 0.120        | 0.089        |

| zebrafish <i>Lm</i> -infected tail wound | R1    |        | R2    |        | R3    |        | Total |        |
|------------------------------------------|-------|--------|-------|--------|-------|--------|-------|--------|
|                                          | cells | larvae | cells | larvae | cells | larvae | cells | larvae |
| Control                                  | 18    | 5      | 29    | 5      | 58    | 6      | 105   | 16     |
| <i>Lm</i> -Infected                      | 350   | 4      | 130   | 4      | 281   | 6      | 761   | 14     |

|                     | NAD(P)H $\tau_m$ (ps) | NAD(P)H $\alpha_1$ (%) | NAD(P)H $\tau_1$ (ps) | NAD(P)H $\tau_2$ (ps) | ORR               |
|---------------------|-----------------------|------------------------|-----------------------|-----------------------|-------------------|
| Control             | 915 (843, 992)        | 75.4 (73.9, 76.8)      | 377 (339, 420)        | 2700 (2560, 2840)     | 0.73 (0.71, 0.74) |
| <i>Lm</i> -infected | 687 (608, 775)        | 78.8 (77.5, 80.2)      | 275 (235, 323)        | 2340 (2220, 2460)     | 0.65 (0.64, 0.66) |
|                     | FAD $\tau_m$ (ps)     | FAD $\alpha_1$ (%)     | FAD $\tau_1$ (ps)     | FAD $\tau_2$ (ps)     |                   |
| Control             | 481 (392, 590)        | 78.5 (76.1, 80.9)      | 247 (187, 324)        | 1680 (1540, 1840)     |                   |
| <i>Lm</i> -infected | 408 (355, 468)        | 79.3 (77.9, 80.2)      | 190 (160, 225)        | 1520 (1430, 1620)     |                   |



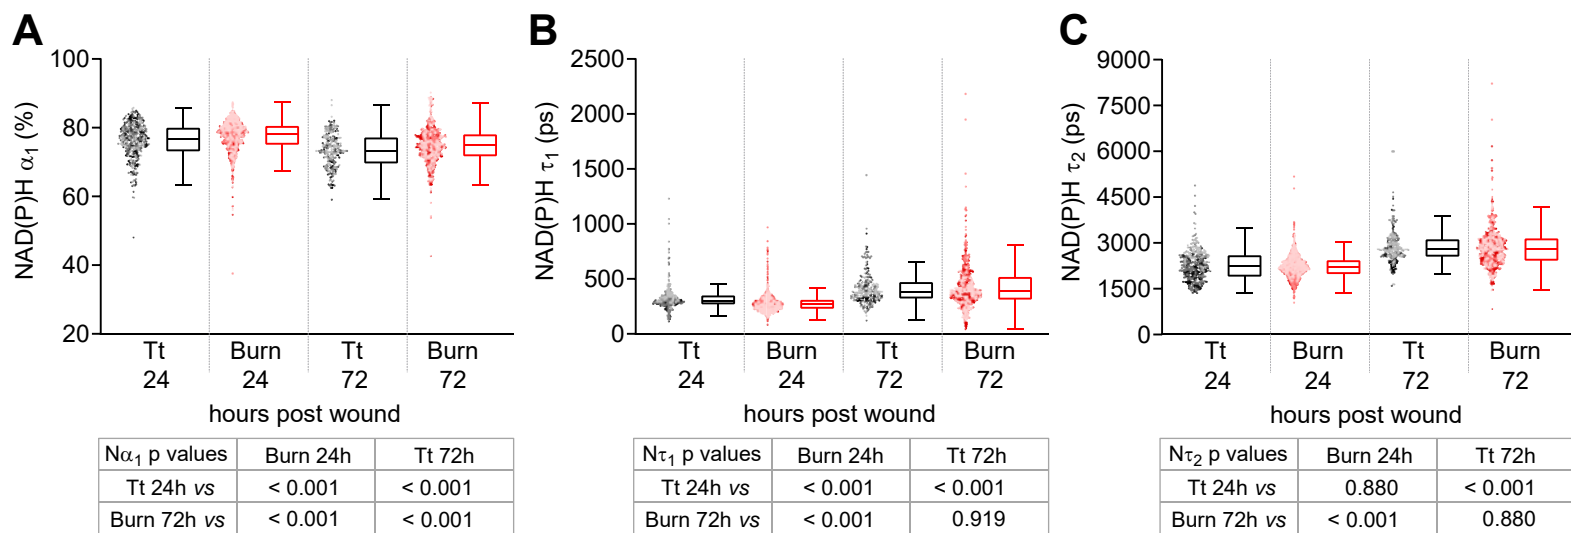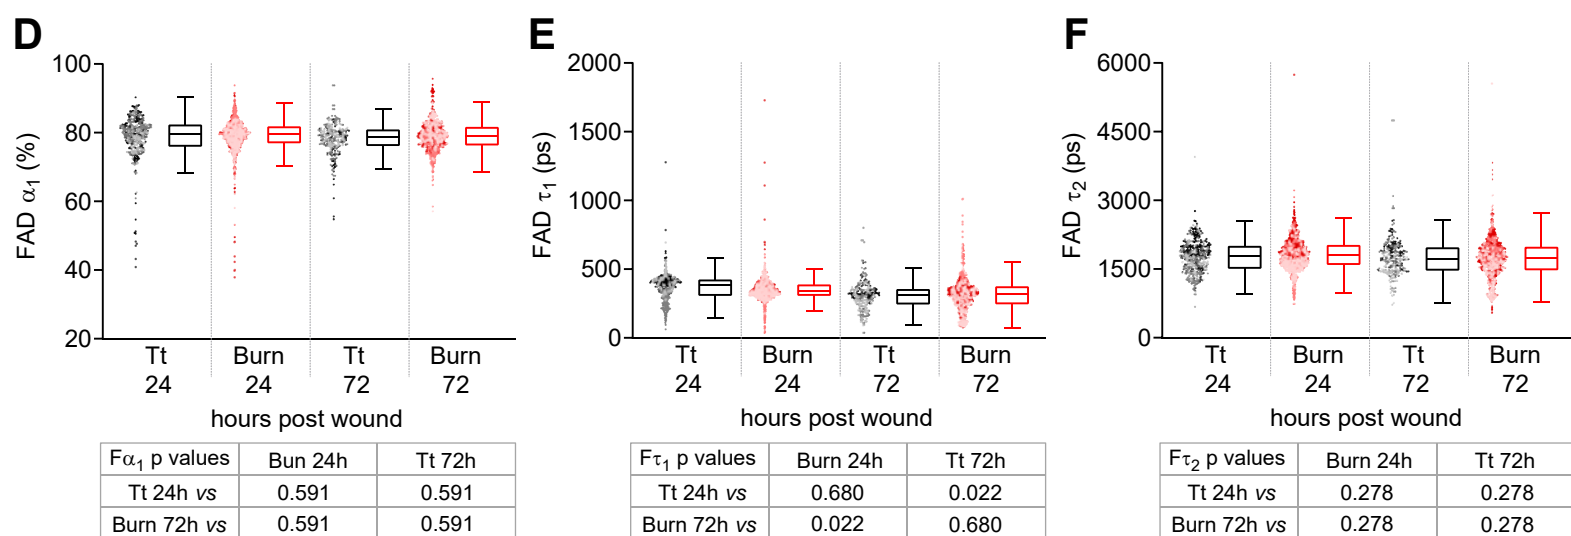

**G**

| zebrafish sterile tail wounds | R1    |        | R2    |        | R3    |        | Total |        |
|-------------------------------|-------|--------|-------|--------|-------|--------|-------|--------|
|                               | cells | larvae | cells | larvae | cells | larvae | cells | larvae |
| Tt 24 hpw                     | 162   | 5      | 102   | 5      | 60    | 6      | 324   | 16     |
| Burn 24 hpw                   | 464   | 4      | 185   | 5      | 201   | 5      | 850   | 14     |
| Tt 72 hpw                     | 81    | 3      | 64    | 3      | 68    | 6      | 213   | 12     |
| Burn 72 hpw                   | 332   | 3      | 110   | 4      | 138   | 4      | 580   | 11     |

**H**

|             | NAD(P)H $\tau_m$ (ps) | NAD(P)H $\alpha_1$ (%) | NAD(P)H $\tau_1$ (ps) | NAD(P)H $\tau_2$ (ps) | ORR               |
|-------------|-----------------------|------------------------|-----------------------|-----------------------|-------------------|
| Tt 24 hpw   | 755 (715, 797)        | 76.4 (75.5, 77.2)      | 306 (289, 325)        | 2250 (2170, 2340)     | 0.70 (0.69, 0.72) |
| Burn 24 hpw | 700 (669, 733)        | 77.7 (77.1, 78.4)      | 274 (264, 284)        | 2220 (2150, 2300)     | 0.64 (0.63, 0.66) |
| Tt 72 hpw   | 1010 (969, 1050)      | 73.4 (72.9, 74.0)      | 398 (371, 427)        | 2830 (2720, 2950)     | 0.76 (0.74, 0.78) |
| Burn 72 hpw | 965 (927, 1010)       | 75.2 (74.1, 76.2)      | 396 (375, 419)        | 2830 (2740, 2920)     | 0.75 (0.74, 0.76) |
|             | FAD $\tau_m$ (ps)     | FAD $\alpha_1$ (%)     | FAD $\tau_1$ (ps)     | FAD $\tau_2$ (ps)     |                   |
| Tt 24 hpw   | 569 (523, 619)        | 78.6 (77.2, 79.9)      | 344 (305, 387)        | 1680 (1620, 1760)     |                   |
| Burn 24 hpw | 563 (533, 596)        | 79.1 (78.2, 79.9)      | 326 (305, 348)        | 1720 (1660, 1780)     |                   |
| Tt 72 hpw   | 526 (491, 565)        | 78.1 (77.0, 79.3)      | 283 (257, 311)        | 1690 (1610, 1790)     |                   |
| Burn 72 hpw | 501 (442, 567)        | 79.0 (77.8, 80.3)      | 288 (245, 339)        | 1610 (1520, 1720)     |                   |
